# Supplementary material for: Identical twins carry a persistent epigenetic signature of early genome programming
Source: PubMed Central journal article supplement (PMC8479069; doi:10.1038/s41467-021-25583-7), 2021-09-28
Supplement: 41467_2021_25583_MOESM1_ESM.pdf [file 41467_2021_25583_MOESM1_ESM.pdf]

## **Supplementary Information**

**Supplementary Note 1** BIOS consortium members

**Supplementary Note 2** Genetics of DNA Methylation Consortium Members

**Supplementary Note 3** Results of Sensitivity analyses

**Supplementary Note 4** Correlation between MZ-DMPs

**Supplementary Note 5** Enrichment analyses EWAS atlas

**Supplementary Note 6** Methylation QTL analyses

**Supplementary Note 7** DNA methylation predictor of MZ twinning

**Supplementary Note 8** Acknowledgements

**Supplementary Figures**

**Supplementary Tables**

**Supplementary References**

## Supplementary Note 1 BIOS consortium members

### BIOS Consortium (Biobank-based Integrative Omics Study)

**Management Team** Bastiaan T. Heijmans (chair)<sup>1</sup>, Peter A.C. 't Hoen<sup>2</sup>, Joyce van Meurs<sup>3</sup>, Aaron Isaacs<sup>4</sup>, Rick Jansen<sup>5</sup>, Lude Franke<sup>6</sup>.

**Cohort collection** Dorret I. Boomsma<sup>7</sup>, René Pool<sup>7</sup>, Jenny van Dongen<sup>7</sup>, Jouke J. Hottenga<sup>7</sup> (Netherlands Twin Register); Marleen MJ van Greevenbroek<sup>8</sup>, Coen D.A. Stehouwer<sup>8</sup>, Carla J.H. van der Kallen<sup>8</sup>, Casper G. Schalkwijk<sup>8</sup> (Cohort study on Diabetes and Atherosclerosis Maastricht); Cisca Wijmenga<sup>6</sup>, Lude Franke<sup>6</sup>, Sasha Zhernakova<sup>6</sup>, Etti F. Tigchelaar<sup>6</sup> (LifeLines Deep); P. Eline Slagboom<sup>1</sup>, Marian Beekman<sup>1</sup>, Joris Deelen<sup>1</sup>, Diana van Heemst<sup>9</sup> (Leiden Longevity Study); Jan H. Veldink<sup>10</sup>, Leonard H. van den Berg<sup>10</sup> (Prospective ALS Study Netherlands); Cornelia M. van Duijn<sup>4</sup>, Bert A. Hofman<sup>11</sup>, Aaron Isaacs<sup>4</sup>, André G. Uitterlinden<sup>3</sup> (Rotterdam Study).

**Data Generation** Joyce van Meurs (Chair)<sup>3</sup>, P. Mila Jhamai<sup>3</sup>, Michael Verbiest<sup>3</sup>, H. Eka D. Suchiman<sup>1</sup>, Marijn Verkerk<sup>3</sup>, Ruud van der Breggen<sup>1</sup>, Jeroen van Rooij<sup>3</sup>, Nico Lakenberg<sup>1</sup>.

**Data management and computational infrastructure** Hailiang Mei (Chair)<sup>12</sup>, Maarten van Iterson<sup>1</sup>, Michiel van Galen<sup>2</sup>, Jan Bot<sup>13</sup>, Dasha V. Zhernakova<sup>6</sup>, Rick Jansen<sup>5</sup>, Peter van 't Hof<sup>12</sup>, Patrick Deelen<sup>6</sup>, Irene Nooren<sup>13</sup>, Peter A.C. 't Hoen<sup>2</sup>, Bastiaan T. Heijmans<sup>1</sup>, Matthijs Moed<sup>1</sup>.

**Data Analysis Group** Lude Franke (Co-Chair)<sup>6</sup>, Martijn Vermaat<sup>2</sup>, Dasha V. Zhernakova<sup>6</sup>, René Luijk<sup>1</sup>, Marc Jan Bonder<sup>6</sup>, Maarten van Iterson<sup>1</sup>, Patrick Deelen<sup>6</sup>, Freerk van Dijk<sup>14</sup>, Michiel van Galen<sup>2</sup>, Wibowo Arindrarto<sup>12</sup>, Szymon M. Kielbasa<sup>15</sup>, Morris A. Swertz<sup>14</sup>, Erik. W van Zwet<sup>15</sup>, Rick Jansen<sup>5</sup>, Peter-Bram 't Hoen (Co-Chair)<sup>2</sup>, Bastiaan T. Heijmans (Co-Chair)<sup>1</sup>.

1. Molecular Epidemiology Section, Department of Medical Statistics and Bioinformatics, Leiden University Medical Center, Leiden, The Netherlands
2. Department of Human Genetics, Leiden University Medical Center, Leiden, The Netherlands
3. Department of Internal Medicine, ErasmusMC, Rotterdam, The Netherlands
4. Department of Genetic Epidemiology, ErasmusMC, Rotterdam, The Netherlands
5. Department of Psychiatry, VU University Medical Center, Neuroscience Campus Amsterdam, Amsterdam, The Netherlands
6. Department of Genetics, University of Groningen, University Medical Centre Groningen, Groningen, The Netherlands
7. Department of Biological Psychology, VU University Amsterdam, Neuroscience Campus Amsterdam, Amsterdam, The Netherlands
8. Department of Internal Medicine and School for Cardiovascular Diseases (CARIM), Maastricht University Medical Center, Maastricht, The Netherlands
9. Department of Gerontology and Geriatrics, Leiden University Medical Center, Leiden, The Netherlands
10. Department of Neurology, Brain Center Rudolf Magnus, University Medical Center Utrecht, Utrecht, The Netherlands
11. Department of Epidemiology, ErasmusMC, Rotterdam, The Netherlands
12. Sequence Analysis Support Core, Leiden University Medical Center, Leiden, The Netherlands
13. SURFsara, Amsterdam, the Netherlands
14. Genomics Coordination Center, University Medical Center Groningen, University of Groningen, Groningen, the Netherlands
15. Medical Statistics Section, Department of Medical Statistics and Bioinformatics, Leiden University Medical Center, Leiden, The Netherlands

## Supplementary Note 2 Genetics of DNA Methylation Consortium members

Josine L Min<sup>1,2\*</sup>, Gibran Hemani<sup>1,2\*</sup>, Eilis Hannon<sup>3</sup>, Koen F Dekkers<sup>4</sup>, Juan Castillo-Fernandez<sup>5</sup>, René Luijk<sup>4</sup>, Elena Carnero-Montoro<sup>5,6</sup>, Daniel J Lawson<sup>1,2</sup>, Kimberley Burrows<sup>1,2</sup>, Matthew Suderman<sup>1,2</sup>, Andrew D Bretherick<sup>7</sup>, Tom G Richardson<sup>1,2</sup>, Johanna Klughammer<sup>8</sup>, Valentina Iotchkova<sup>9</sup>, Gemma Sharp<sup>1,2</sup>, Ahmad Al Khleifat<sup>10</sup>, Aleksey Shatunov<sup>10</sup>, Alfredo Iacoangeli<sup>10,11</sup>, Wendy L McArdle<sup>2</sup>, Karen M Ho<sup>2</sup>, Ashish Kumar<sup>12,13,14</sup>, Cilla Söderhäll<sup>15</sup>, Carolina Soriano-Tárraga<sup>16</sup>, Eva Giralt-Steinhauer<sup>16</sup>, Nabila Kazmi<sup>1,2</sup>, Dan Mason<sup>17</sup>, Allan F McRae<sup>18</sup>, David L Corcoran<sup>19</sup>, Karen Sugden<sup>19,20</sup>, Silva Kasela<sup>21</sup>, Alexia Cardona<sup>22,23</sup>, Felix R Day<sup>22</sup>, Giovanni Cugliari<sup>24,25</sup>, Clara Viberti<sup>24,25</sup>, Simonetta Guarrera<sup>24,25</sup>, Michael Lerro<sup>26</sup>, Richa Gupta<sup>27,28</sup>, Sailalitha Bollepalli<sup>27,28</sup>, Pooja Mandaviya<sup>29</sup>, Yanni Zeng<sup>7,30,31</sup>, Toni-Kim Clarke<sup>32</sup>, Rosie M Walker<sup>33,34</sup>, Vanessa Schmolz<sup>35</sup>, Darina Czamara<sup>35</sup>, Carlos Ruiz-Arenas<sup>36,37,38</sup>, Faisal I Rezwani<sup>39</sup>, Riccardo E Marioni<sup>33,34</sup>, Tian Lin<sup>18</sup>, Yvonne Awaloff<sup>35</sup>, Marine Germain<sup>40</sup>, Dylan Aïssi<sup>41</sup>, Ramona Zwamborn<sup>42</sup>, Kristel van Eijk<sup>42</sup>, Annelot Dekker<sup>42</sup>, Jenny van Dongen<sup>43</sup>, Jouke-Jan Hottenga<sup>43</sup>, Gonneke Willemsen<sup>43</sup>, Cheng-Jian Xu<sup>44,45</sup>, Guillermo Barturen<sup>6</sup>, Francesc Català-Moll<sup>46</sup>, Martin Kerick<sup>47</sup>, Carol Wang<sup>48</sup>, Phillip Melton<sup>49</sup>, Hannah R Elliott<sup>1,2</sup>, Jean Shin<sup>50</sup>, Manon Bernard<sup>50</sup>, Idil Yet<sup>5,51</sup>, Melissa Smart<sup>52</sup>, Tyler Gorrie-Stone<sup>53</sup>, BIOS Consortium<sup>54</sup>, Chris Shaw<sup>10,55</sup>, Ammar Al Chalabi<sup>10,55,56</sup>, Susan M Ring<sup>1,2</sup>, Göran Pershagen<sup>12</sup>, Erik Melén<sup>12,57</sup>, Jordi Jiménez-Conde<sup>16</sup>, Jaume Roquer<sup>16</sup>, Deborah A Lawlor<sup>1,2</sup>, John Wright<sup>17</sup>, Nicholas G Martin<sup>58</sup>, Grant W Montgomery<sup>18</sup>, Terrie E Moffitt<sup>19,20,59,62</sup>, Richie Poulton<sup>60</sup>, Tõnu Esko<sup>21,61</sup>, Lili Milani<sup>21</sup>, Andres Metspalu<sup>21</sup>, John RB Perry<sup>22</sup>, Ken K Ong<sup>22</sup>, Nicholas J Wareham<sup>22</sup>, Giuseppe Matullo<sup>24,25</sup>, Carlotta Sacerdote<sup>25,63</sup>, Salvatore Panico<sup>64</sup>, Avshalom Caspi<sup>19,20,59,62</sup>, Louise Arseneault<sup>62</sup>, France Gagnon<sup>26</sup>, Miina Ollikainen<sup>27,28</sup>, Jaakko Kaprio<sup>27,28</sup>, Janine F Felix<sup>65,66</sup>, Fernando Rivadeneira<sup>29</sup>, Henning Tiemeier<sup>67,68</sup>, Marinus H van IJzendoorn<sup>69,70</sup>, André G Uitterlinden<sup>29</sup>, Vincent WV Jaddoe<sup>65,66</sup>, Chris Haley<sup>7</sup>, Andrew M McIntosh<sup>32,34</sup>, Kathryn L Evans<sup>33,34</sup>, Alison Murray<sup>71</sup>, Katri Räikkönen<sup>72</sup>, Jari Lahti<sup>72</sup>, Ellen A Nohr<sup>73,74</sup>, Thorkild IA Sørensen<sup>1,2,75,76</sup>, Torben Hansen<sup>75</sup>, Camilla S Morgen<sup>75,77</sup>, Elisabeth B Binder<sup>35,78</sup>, Susanne Lucae<sup>35</sup>, Juan Ramon Gonzalez<sup>36,37,38</sup>, Mariona Bustamante<sup>36,37,38,79</sup>, Jordi Sunyer<sup>36,37,38,80</sup>, John W Holloway<sup>81,82</sup>, Wilfried Karmaus<sup>83</sup>, Hongmei Zhang<sup>83</sup>, Ian J Deary<sup>34</sup>, Naomi R Wray<sup>18,84</sup>, John M Starr<sup>34,85</sup>, Marian Beekman<sup>4</sup>, Diana van Heemst<sup>86</sup>, P Eline Slagboom<sup>4</sup>, Pierre-Emmanuel Morange<sup>87</sup>, David-Alexandre Trégouët<sup>40</sup>, Jan H Veldink<sup>42</sup>, Gareth E Davies<sup>88</sup>, Eco JC de Geus<sup>43</sup>, Dorret I Boomsma<sup>43</sup>, Judith M Vonk<sup>89</sup>, Bert Brunekreef<sup>90,91</sup>, Gerard H Koppelman<sup>44</sup>, Marta E Alarcón-Riquelme<sup>6,12</sup>, Rae-Chi Huang<sup>92</sup>, Craig E Pennell<sup>48</sup>, Joyce van Meurs<sup>29</sup>, M Arfan Ikram<sup>93</sup>, Alun D Hughes<sup>94</sup>, Therese Tillin<sup>94</sup>, Nish Chaturvedi<sup>94</sup>, Zdenka Pausova<sup>50</sup>, Tomas Paus<sup>95</sup>, Timothy D Spector<sup>5</sup>, Meena Kumari<sup>52</sup>, Leonard C Schalkwyk<sup>53</sup>, Peter M Visscher<sup>18,84</sup>, George Davey Smith<sup>1,2</sup>, Christoph Bock<sup>8,96</sup>, Tom R Gaunt<sup>1,2</sup>, Jordana T Bell<sup>5‡</sup>, Bastiaan T Heijmans<sup>4‡</sup>, Jonathan Mill<sup>3‡</sup>, Caroline L Relton<sup>1,2‡</sup>

\* These authors contributed equally to this research.

‡These authors jointly supervised this work.

**Corresponding author:** Josine L Min, josine.min@bristol.ac.uk

## Affiliations

<sup>1</sup> MRC Integrative Epidemiology Unit, University of Bristol, Bristol, UK

<sup>2</sup> Population Health Sciences, Bristol Medical School, University of Bristol, Bristol, UK

<sup>3</sup> University of Exeter Medical School, College of Medicine and Health, University of Exeter, Exeter, UK

- <sup>4</sup> Molecular Epidemiology, Department of Biomedical Data Sciences, Leiden University Medical Center, Leiden, The Netherlands
- <sup>5</sup> Department of Twin Research and Genetic Epidemiology, King's College London, London, UK
- <sup>6</sup> Pfizer - University of Granada - Andalusian Government Center for Genomics and Oncological Research (GENYO), Spain
- <sup>7</sup> MRC Human Genetics Unit, Institute of Genetics and Molecular Medicine, University of Edinburgh, Edinburgh, UK
- <sup>8</sup> CeMM Research Center for Molecular Medicine of the Austrian Academy of Sciences, Vienna, Austria
- <sup>9</sup> MRC Weatherall Institute of Molecular Medicine, Oxford, UK
- <sup>10</sup> Department of Basic and Clinical Neuroscience, Maurice Wohl Clinical Neuroscience Institute, London, UK
- <sup>11</sup> Department of Biostatistics and Health Informatics, King's College London, London, UK
- <sup>12</sup> Institute of Environmental Medicine, Karolinska Institutet, Stockholm, Solna, Sweden
- <sup>13</sup> Chronic Disease Epidemiology unit, Swiss Tropical and Public Health Institute, Basel, Switzerland
- <sup>14</sup> University of Basel, Basel, Switzerland
- <sup>15</sup> Department of Women's and Children's Health, Karolinska Institutet, Stockholm, Sweden
- <sup>16</sup> Neurology Department, Hospital del Mar - IMIM (Institut Hospital del Mar d'Investigacions Mèdiques), Barcelona, Spain
- <sup>17</sup> Bradford Institute for Health Research, Bradford, UK
- <sup>18</sup> Institute for Molecular Bioscience, University of Queensland, Australia
- <sup>19</sup> Center for Genomic and Computational Biology, Duke University, Durham, NC, USA
- <sup>20</sup> Department of Psychology and Neuroscience, Duke University, Durham, NC, USA
- <sup>21</sup> Estonian Genome Center, Institute of Genomics, University of Tartu, Estonia
- <sup>22</sup> MRC Epidemiology Unit, University of Cambridge, School of Clinical Medicine, Institute of Metabolic Science, Cambridge Biomedical Campus, Cambridge CB2 0QQ, United Kingdom
- <sup>23</sup> Department of Genetics, University of Cambridge, Downing Street, Cambridge CB2 3EH, United Kingdom
- <sup>24</sup> Department of Medical Sciences, University of Turin, Turin, Italy
- <sup>25</sup> Italian Institute for Genomic Medicine (IIGM), Turin, Italy
- <sup>26</sup> Dalla Lana School of Public Health, University of Toronto, Toronto, Canada
- <sup>27</sup> Institute for Molecular Medicine, University of Helsinki, Helsinki, Finland
- <sup>28</sup> Department of Public Health, Faculty of Medicine, University of Helsinki, Helsinki, Finland
- <sup>29</sup> Department of Internal Medicine, Erasmus University Medical Center, Rotterdam, The Netherlands
- <sup>30</sup> Faculty of Forensic Medicine, Zhongshan School of Medicine, Sun Yat-Sen University, Guangzhou, China
- <sup>31</sup> Guangdong Province Key Laboratory of Brain Function and Disease, Zhongshan School of Medicine, Sun Yat-Sen University, Guangzhou, China
- <sup>32</sup> Division of Psychiatry, Royal Edinburgh Hospital, University of Edinburgh, Edinburgh EH10 5HF, UK
- <sup>33</sup> Centre for Genomic and Experimental Medicine, Institute of Genetics and Molecular Medicine, Western General Hospital, University of Edinburgh, Crewe Road, Edinburgh EH4 2XU, UK
- <sup>34</sup> Centre for Cognitive Ageing and Cognitive Epidemiology, Department of Psychology, University of Edinburgh, 7 George Square, Edinburgh EH8 9JZ, UK
- <sup>35</sup> Department of Translational Research in Psychiatry, Max-Planck-Institute of Psychiatry, Munich, Germany
- <sup>36</sup> ISGlobal, Barcelona Global Health Institute, Barcelona, Spain
- <sup>37</sup> Universitat Pompeu Fabra (UPF), Barcelona, Spain
- <sup>38</sup> CIBER Epidemiología y Salud Pública (CIBERESP), Madrid, Spain
- <sup>39</sup> School of Water, Energy and Environment, Cranfield University, Cranfield, Bedfordshire MK43 0AL, UK

- <sup>40</sup> INSERM UMR\_S 1219, Bordeaux Population Health Center, University of Bordeaux, 33076 Bordeaux Cedex, France
- <sup>41</sup> Department of General and Interventional Cardiology, University Heart Center Hamburg, Hamburg, Germany
- <sup>42</sup> Department of Neurology, Brain Center Rudolf Magnus, University Medical Center Utrecht, Utrecht, 3584 CG, The Netherlands
- <sup>43</sup> Department of Biological Psychology, Amsterdam Public Health Research Institute, Vrije Universiteit Amsterdam, Van Der Boechorststraat 7-9, 1081 BT, Amsterdam, The Netherlands
- <sup>44</sup> University of Groningen, University Medical Center Groningen, Department of Pediatric Pulmonology and Pediatric Allergology, Beatrix Children's Hospital, GRIAC Research Institute Groningen, The Netherlands
- <sup>45</sup> CiiM and TWINCORE, joint ventures between the Hannover Medical School and the Helmholtz Centre for Infection Research, Hannover, Germany
- <sup>46</sup> Chromatin and Disease Group, Cancer Epigenetics and Biology Programme (PEBC), Bellvitge Biomedical Research Institute (IDIBELL), 08908 L'Hospitalet de Llobregat, Barcelona, Spain
- <sup>47</sup> Instituto de Parasitología y Biomedicina López Neyra, CSIC, Granada, Spain
- <sup>48</sup> School of Medicine and Public Health, College of Health, Medicine and Wellbeing, The University of Newcastle, Newcastle, NSW, Australia
- <sup>49</sup> Menzies Institute for Medical Research, College of Health and Medicine, University of Tasmania, Hobart, Australia, School of Global Population Health, Faculty of Health and Medical Sciences, The University of Western Australia, Perth, WA, Australia; School of Pharmacy and Biomedical Sciences, Faculty of Health Sciences, Curtin University, Perth, WA, Australia
- <sup>50</sup> The Hospital for Sick Children, University of Toronto, Toronto, Canada
- <sup>51</sup> Department of Bioinformatics, Institute of Health Sciences, Hacettepe University, 06100, Ankara, Turkey
- <sup>52</sup> Institute for Social and Economic Research, University of Essex, Wivenhoe Park, Colchester, Essex, CO4 3SQ
- <sup>53</sup> School of Life Sciences, University of Essex, Wivenhoe Park, Colchester, Essex, CO4 3SQ
- <sup>54</sup> A list of consortium authors and affiliations appears at the end of the paper.
- <sup>55</sup> Department of Neurology, King's College Hospital, London, UK
- <sup>56</sup> United Kingdom Dementia Research Institute, King's College London, London, UK
- <sup>57</sup> Department of Clinical Science and Education, Södersjukhuset, Karolinska Institutet, Stockholm, Sweden
- <sup>58</sup> QIMR Berghofer Medical Research Institute, Brisbane, Australia
- <sup>59</sup> Department of Psychiatry and Behavioral Sciences, Duke University Medical School, Durham, NC, USA
- <sup>60</sup> Dunedin Multidisciplinary Health and Development Research Unit, Department of Psychology, University of Otago, Dunedin, New Zealand
- <sup>61</sup> Program in Medical and Population Genetics, Broad Institute, Broad Institute, Cambridge, MA, USA
- <sup>62</sup> Social, Genetic and Developmental Psychiatry Centre, Institute of Psychiatry, Psychology and Neuroscience, King's College London, London, UK
- <sup>63</sup> Piemonte Centre for Cancer Prevention, Turin, Italy
- <sup>64</sup> Dipartimento Di Medicina Clinica E Chirurgia, Federico II University, Naples, Italy
- <sup>65</sup> The Generation R Study Group, Erasmus MC, University Medical Center Rotterdam, Rotterdam, The Netherlands
- <sup>66</sup> Department of Pediatrics, Erasmus MC, University Medical Center Rotterdam, Rotterdam, The Netherlands
- <sup>67</sup> Department of Child and Adolescent Psychiatry, Erasmus Medical Center, Rotterdam, Netherlands

- <sup>68</sup> Department of Social and Behavioral Science, Harvard TH Chan School of Public Health, Boston, USA
- <sup>69</sup> Department of Psychology, Education and Child Studies, Erasmus University Rotterdam, The Netherlands
- <sup>70</sup> Department of Clinical, Educational and Health Psychology, Division on Psychology and Language Sciences, Faculty of Brain Sciences, UCL, London, UK
- <sup>71</sup> Institute of Medical Sciences, University of Aberdeen, Aberdeen, UK
- <sup>72</sup> Department of Psychology and Logopedics, Faculty of Medicine, University of Helsinki, Finland
- <sup>73</sup> Research Unit for Gynaecology and Obstetrics, Institute of Clinical research, University of Southern Denmark, Odense, Denmark
- <sup>74</sup> Centre of Women's, Family and Child Health, University of South-Eastern Norway, Kongsberg, Norway
- <sup>75</sup> The Novo Nordisk Foundation Center for Basic Metabolic Research, Faculty of Health and Medical Sciences, University of Copenhagen, Denmark
- <sup>76</sup> Department of Public Health (Section of Epidemiology), Faculty of Health and Medical Sciences, University of Copenhagen, Copenhagen, Denmark.
- <sup>77</sup> The National Institute of Public Health, University of Southern Denmark, Copenhagen
- <sup>78</sup> Department of Psychiatry and Behavioral Sciences, Emory University School of Medicine, Atlanta, GA, USA
- <sup>79</sup> Center for Genomic Regulation (CRG), Barcelona Institute of Science and Technology, Barcelona, Spain
- <sup>80</sup> IMIM (Hospital del Mar Medical Research Institute), Barcelona, Spain
- <sup>81</sup> Human Development and Health, Faculty of Medicine, University of Southampton, Southampton, UK
- <sup>82</sup> Clinical and Experimental Sciences, Faculty of Medicine, University of Southampton, Southampton, UK
- <sup>83</sup> Division of Epidemiology, Biostatistics, and Environmental Health Sciences, School of Public Health, University of Memphis, Memphis, USA
- <sup>84</sup> Queensland Brain Institute, University of Queensland, Australia
- <sup>85</sup> Alzheimer Scotland Dementia Research Centre, University of Edinburgh, University of Edinburgh, UK
- <sup>86</sup> Department of Gerontology and Geriatrics, Leiden University Medical Center, Leiden, The Netherlands
- <sup>87</sup> C2VN, Aix-Marseille University, INSERM, INRAE, Marseille, France
- <sup>88</sup> Avera Institute for Human Genetics, Sioux Falls, USA
- <sup>89</sup> University of Groningen, University Medical Center Groningen, Department of Epidemiology, GRIAC Research Institute Groningen, Groningen, The Netherlands
- <sup>90</sup> Institute for Risk Assessment Sciences, Universiteit Utrecht, Utrecht, The Netherlands
- <sup>91</sup> Julius Center for Health Sciences and Primary Care, University Medical Center Utrecht, Utrecht, The Netherlands
- <sup>92</sup> Telethon Kids Institute, University of Western Australia, Perth, WA, Australia
- <sup>93</sup> Department of Epidemiology, Erasmus MC, University Medical Center Rotterdam, Rotterdam, The Netherlands
- <sup>94</sup> UCL Institute of Cardiovascular Science, London, UK
- <sup>95</sup> Departments of Psychology and Psychiatry, University of Toronto, Toronto, Canada
- <sup>96</sup> Institute of Artificial Intelligence and Decision Support, Center for Medical Statistics, Informatics, and Intelligent Systems, Medical University of Vienna, Vienna, Austria

## Supplementary Note 3 Results of Sensitivity analyses

### Parents and siblings as control group

In total, 24 sites were Bonferroni significant in the EWAS (N=1161) with MZ twins as cases, non-twins, i.e. parents and siblings, as controls (and all DZ twins excluded).

The effect sizes of the 243 epigenome-wide significant sites detected in NTR with the primary analysis reported in this paper (MZ twins versus DZ twins, N=1957) correlated strongly with effect sizes obtained by comparing MZ twins to parents and siblings and 242 sites (99.6%) showed the same direction of effect ( $r=0.96$ ,  $p < 2.2e-16$ , **Figure S1A**, **Supplementary Data 2**).

By contrast, in an EWAS of DZ twins versus non-twins (N= 1270, all MZ twins were excluded), 0 sites were Bonferroni significant, the correlation between effect sizes was -0.34 ( $p\text{-value} = 3.6 \times 10^{-8}$ , **figure S1B**, **Supplementary Data 1**) and 90 showed the same direction of effect as in the comparison of DZ versus MZ twins. These results indicate that the results from our primary EWAS (mainly) reflect differential DNA methylation in MZ twins.

In the Brisbane System Genetics Study (BSGS), which 125 MZ twins, 194 DZ twins, 95 siblings of twins, and 62 parents of twins, the 243 CpGs detected in NTR showed equally strong concordance of effects when comparing MZ twins to DZ twins as when comparing MZ twins to everyone else (DZ twins, siblings and parents;  $r=0.91$ ,  $p < 2.2e-16$ , **Figure S2**, **Supplementary Data 1**).

### Complete twin pairs versus single twins

We compared the primary EWAS approach with one randomly excluded MZ twin for each pair to 1) an EWAS performed in gee with complete MZ pairs and complete DZ pairs included and 2) an EWAS with a simple linear model (R function `lm()`) with only one randomly selected twin of each MZ and one randomly selected twin of each DZ pair included.

In total, 243 sites were epigenome-wide significant in the primary analysis reported in this paper (N=1957), 258 sites were epigenome-wide significant in the analysis that included all twins, including complete MZ twin pairs and complete DZ twin pairs, and twins from incomplete pairs (N=2750), and 130 sites were epigenome-wide significant in the analysis of single MZ twins and single DZ twins (N=1538).

The effect sizes of the 243 epigenome-wide significant sites detected in NTR with the primary analysis reported in this paper (single MZ twins and all DZ twins included, thus including complete DZ pairs and DZ twins from incomplete pairs) correlated strongly with effect sizes obtained with the analysis with all complete pairs included ( $r= 0.999$ , **figure S1C**)

and with the analysis with only single twins included ( $r= 0.996$ , **figure S1D**), and adding the extra MZ co-twin did not cause a large increase in the number of significant loci (this is expected if MZ twinning is associated with CpGs whose methylation levels are strongly correlated between MZ twins), with only 15 extra Bonferroni significant CpGs (6%).

### **Covariates**

The primary EWAS analyses included the following covariates: age, sex, BMI, smoking, percentage of monocytes, percentage of eosinophils, percentage of neutrophils, sample plate and array row. We chose to correct for covariates that are known to be strongly associated with DNA methylation. In NTR, MZ and DZ twins showed small differences in the proportion of males and females, BMI, age, and sample plate, and no significant differences in cell counts.

In the analysis of single MZ twins and single DZ twins (N=1538) without any covariates included in the model, summary statistics showed inflation ( $\lambda=1.35$ ). After adjusting for inflation, 59 sites were epigenome-wide significant. The effect sizes of the 243 epigenome-wide significant sites detected in NTR with the primary analysis reported in this paper, with covariates age, sex, BMI, smoking, white blood cell percentages, sample plate and array row, correlated strongly with effect sizes obtained in the EWAS of single MZ twins and single DZ twins without any covariate ( $r= 0.99$ , **figure S1E**). All 243 DMPs showed the same direction of association without adjustment for any covariates.

### **Sex-stratified EWAS**

In male twins and female twins separately, we performed an EWAS with a simple linear model (R function `lm()`) to compare female MZ twins to female DZ twins, and male MZ twins to male DZ twins. Only one randomly selected twin from each MZ pair and each DZ pair was included in these analyses.

In total, 28 sites were epigenome-wide significant in this analysis of female twins (N=1033) and 4 sites were epigenome-wide significant in the analysis of male twins (N=505).

The effect sizes of the 243 epigenome-wide significant sites detected in NTR with the primary analysis reported in this paper (single MZ twin and DZ pairs included) correlated strongly with effect sizes obtained in the analysis of females only ( $r= 0.99$ , **figure S1F**), and in the analysis of males only ( $r=0.97$ , **figure S1G**). Effect sizes obtained in the female EWAS also correlated strongly with the effect sizes obtained in the male EWAS ( $r=0.94$ , **figure S1H**).

### **Correction for top *cis* mQTL**



We repeated the primary EWAS analysis in NTR for the DMPs detected in the meta-analysis adjusting, in addition to the same covariates as before (sex, age, cell counts, BMI, smoking, array row and sample plate), for genotype at the strongest *cis* mQTL SNP of each CpG (**Supplementary Note 6**) and three principal components (PCs) based on the genotype data. This analysis was performed in gee on all twins on which the primary EWAS analysis was performed (one randomly selected MZ twin and complete DZ twin pairs) for whom genotype data were available (N=1713). The analysis was conducted for 502 methylation sites with a significant *cis* mQTL and for which the SNP was available in NTR.

In total, 109 CpGs were associated with MZ versus DZ zygosity after adjusting for the strongest *cis* mQTL (plus the above-mentioned covariates) at  $p < 1 \times 10^{-7}$ , and the effect size of zygosity was unaffected adjusting for the top *cis* mQTL (**Figure S20A**). Effect sizes of zygosity and *cis* mQTLs did not correlate (**Figure S20B**). Based on results from the same model, 251 CpGs were associated with the selected top-SNP in NTR at  $p < 1 \times 10^{-7}$  (**Figure S20C**) confirming the *cis* mQTL effect in this sample. These results suggest that *cis* mQTLs and zygosity are independently associated with methylation level at these CpGs. Histograms of the effect sizes of zygosity and *cis* mQTLs (taken from the same model) illustrate that the methylation differences between MZ and DZ twins are on average about half the effect size associated with each effect allele of *cis* mQTLs (**Figure S20D** and **Figure S20F**).

#### **Supplementary Note 4** Correlation between MZ-DMPs

We explored whether methylation differences occur across extended stretches of DNA, which may indicate underlying regulatory mechanisms, and computed the correlation between DNA methylation levels in data from NTR to examine the extent to which the 834 MZ-DMPs are independent. While the average correlation across all 834 MZ-DMPs was small (mean=0.09, range=-0.69-0.98), the correlation between DMPs within a window of 1 Mb around each DMP with the most significant p-value was moderate (mean=0.53, range=0.04-0.98; for 99 windows containing 3 or more DMPs and an average size of 366 kb, range=7bp-1.4Mb). Examples of large regions are shown in **Fig. S3**.

We note that correlations between methylation levels at different CpGs may also arise due to cross-hybridization of probes to multiple locations. We note that we already excluded probes reported by Chen *et al* with an overlap of at least 47 bases per probe<sup>1</sup>, which is the most commonly used exclusion criterium in EWA studies, from all of our analyses to avoid this issue. We additionally examined a more stringent definition based on a lower degree of sequence overlap of 30 bases per probe<sup>2</sup>, which flagged 18 of the 834 MZ-DMPs (2.1%) as potentially cross-hybridizing. We have flagged these DMPs in **Supplementary Data 3**.

The sequence similarity of probes for the 834 MZ-DMPs was generally low. On average, 3.5 bases overlapped, the maximum overlap was 26 bases, and 685 CpGs (82%) are targeted by probes that show less than 14 bases overlap with probes for other MZ-DMPs. We examined one region in more detail; the *PCDH* gene clusters on chromosome 5, because the genes in this region are known to show large sequence similarity. Our EWAS meta-analysis identified 79 MZ-DMPs in this region (**Fig. S3B**). Among the 79 CpGs, the overlap in probe sequences between probes for different CpGs was on average only 3.5 bases, the maximum overlap was 21 bases and 77 of the 79 CpGs had less than 14 overlapping bases. This illustrates that the probes for these 79 CpGs are designed to target largely distinct sequences within the *PCDH* gene clusters, however, we note that all 79 CpGs are targeted by probes that show a small degree of off-target sequence overlap ( $\geq 14$  bases<sup>3</sup>) with other sequences within this genomic region.

## **Supplementary Note 5** Enrichment analyses EWAS atlas

We performed enrichment analyses against all previously reported associations in EWASs of diseases and environmental exposures. The strongest enrichment for hypermethylated DMPs was folic acid supplementation during pregnancy (OR=293,  $P=7.3 \times 10^{-154}$ ), followed by neurodevelopmental presentations and congenital anomalies (OR= 65,  $P = 1.2 \times 10^{-50}$ ), and Immunodeficiency, Centromeric instability, Facial anomalies syndrome (ICF syndrome; OR=174,  $P = 3.8 \times 10^{-37}$ ), a rare disorder often caused by mutations in one of the DNA methyltransferase genes (*DNMT3B*). The strongest enrichment for hypomethylated CpGs was Kabuki Syndrome (OR=70,  $P=9.5 \times 10^{-159}$ ), a rare disorder caused by mutations in *KMT2D*, which codes for a histone lysine methyltransferase, and *KDM6A*, which codes for a histone lysine demethylase. Further enrichment was seen for a whole range of traits and exposures, including prenatal exposures, congenital anomalies, and preterm birth (**Supplementary Data 6 and 7**). The enrichments further confirm that the MZ twinning epigenetic signature is linked to early-life epigenetic reprogramming.

## Supplementary Note 6 Methylation QTL analyses

We obtained methylation QTL (mQTL) results for the 834 DMPs (497 hypomethylated, and 337 hypermethylated; **Supplementary Data 10 and 11**) from our EWAS in the largest mQTL catalogue to date; the whole blood mQTL results from the Genetics of DNA Methylation Consortium (GoDMC, N= 27,750)<sup>4</sup>. This revealed 108,241 significant *cis* associations between 365 hypo-DMPs and 61,823 genetic variants and 77,988 significant *cis* associations between 196 hyper-DMPs and 35,899 variants. In addition, there were 8,197 significant *trans* associations between 4,166 variants and 73 hypo-DMPs and 2,890 significant *trans* associations between 2,116 variants and 52 hyper-DMPs. *Trans* mQTLs were associated with up to 15 CpGs (average=1.8). Among the genes annotated to *trans* mQTLs were key epigenetic modifiers including *TRIM28* (*trans* mQTL for hypomethylated DMPs) and the *de novo* methyltransferase *DNMT3B* (*trans* mQTL for hypomethylated DMPs), and a large number of zinc finger genes (for both hypomethylated and hypermethylated DMPs). SNPs with the largest number of *trans* effects were annotated to the *ZNF* gene cluster on chromosome 19 (up to 15 CpGs), and *DPPA4*<sup>5,6</sup>, which encodes a key regulator of developmental pluripotency that interacts with the Polycomb Repressor Complex<sup>7</sup> (SNPs rs1044266, rs1163441, and rs2930074, each associated with 11 CpGs in *trans*). *Dppa4* forms a heterodimer with *Dppa2*<sup>8</sup>. In line with the enrichment of hypomethylated DMPs within polycomb-repressed chromatin states, *DPPA2* and *DPPA4* are *trans* mQTLs for hypomethylated DMPs.

In line with the previously reported influence of genetic variants on MEs<sup>9</sup>, 53 (77%) of the putative MEs associated with zygosity were associated with at least one mQTL *in cis*, and 14 (19%) were associated with at least one mQTL *in trans*.

We note that hypermethylated CpGs were significantly enriched in regions containing repeats; the effect of such repeats on DNA methylation is not fully captured in mQTL analyses. Thus, we cannot rule out that repeat variation might contribute to this DNA methylation signature.

In NTR, we examined whether association with zygosity remained after adjusting for the strongest *cis* mQTL at each site; results remained unchanged (**Supplementary Note 3, Figure S20**), illustrating that zygosity and *cis* mQTLs are independently associated with these methylation sites.

## **Supplementary Note 7** DNA methylation predictor of MZ twinning

We compared models based on two input sets (genome-wide methylation sites versus meta-analysis DMPs), and trained on two phenotypes (MZ versus DZ twins, and MZ twins versus everyone else (including DZ twins and family members of twins)). Regressions returned predictors based on 232-1867 methylation sites (**Supplementary Data 12**). In NTR test data from blood (which were left out of the training dataset), the area under the curve (AUC) ranged from 0.69 to 0.77, with up to 84% of MZ twins correctly classified, up to 57% of DZ twins correctly classified, and up to 63% of family members correctly classified as non-MZ. We tested prediction in two independent datasets (**Table 1**): BSGS (blood from MZ twins, DZ twins, and family members, 450k array) and NTR children (buccal from MZ and DZ twins, EPIC array). AUCs ranged from 0.67 to 0.80 in BSGS, and from 0.63 to 0.76 in buccal data from NTR children. The predictors performed best when trained on genome-wide significant CpGs from the meta-analysis (rather than genome-wide methylation data). Weights of these scores are provided in **Supplementary Data 13** and **Supplementary Data 14**.

In the group of NTR children with buccal methylation data and information on chorionicity available, we compared the performance of the predictor for MZ twins with different chorionicities. The performance was similar across chorionicities. For the predictor that performed best on data from buccal (trained to distinguish MZ versus DZ twins, on genome-wide significant CpGs), the percentage of correctly predicted MZ twins were: 76% for monozygotic monoamniotic twins, 72% for monozygotic diamniotic twins, and 75% for dizygotic twins.

## **Supplementary Note 8 Acknowledgements**

### NTR adults (discovery cohort)

NTR warmly thanks all participants. We acknowledge funding from the Netherlands Organization for Scientific Research (NWO): Biobanking and Biomolecular Research Infrastructure (BBMRI–NL, 184.021.007; 184.033.111); epigenetic data were generated at the Human Genotyping facility (HugeF) of ErasmusMC, the Netherlands. Genotyping was made possible by grants from NWO/SPI 56-464-14192, Genetic Association Information Network (GAIN) of the Foundation for the National Institutes of Health, Rutgers University Cell and DNA Repository (NIMH U24 MH068457-06), the Avera Institute, Sioux Falls (USA) and the National Institutes of Health (NIH R01 HD042157-01A1, MH081802, Grand Opportunity grants 1RC2 MH089951 and 1RC2 MH089995) and European Research Council (ERC-230374). JvD is supported by NWO Large Scale infrastructures, X-Omics (184.034.019). DIB acknowledges the Royal Netherlands Academy of Science Professor Award (PAH/6635).

### E-Risk

We would like to thank the E-Risk study members for their participation. The E-Risk Study is funded by the Medical Research Council (G1002190) and the National Institute of Child Health and Human Development (HD077482). Further support was provided by the Jacobs Foundation. The generation of DNA methylation data was supported by a Distinguished Investigator Award to Jonathan Mill by the American Asthma Foundation. This work used a high-performance computing facility partially supported by grant 2016-IDG-1013 (“HARDAC+: Reproducible HPC for Next-generation Genomics”) from the North Carolina Biotechnology Center.

### FTC

We would like to thank all the FTC participants, without whom this research would not be possible. This work was supported by the Academy of Finland [213506, 265240, 263278, 312073 to JK, and 297908 to MO], EC FP5 GenomEUtwin (JK), NIH NIH/NHLBI (grant HL104125), EC MC ITN Project EPITRAIN (JK & MO) project and the University of Helsinki Research Funds to MO, Sigrid Juselius Foundation to JK and MO.

### TwinsUK

We would like to thank the twins for their participation. TwinsUK was funded by the Wellcome Trust; European Community's Seventh Framework Programme (FP7/2007-2013) and also receives support from the National Institute for Health Research (NIHR)-funded BioResource, Clinical Research Facility and Biomedical Research Centre based at Guy's and St Thomas' NHS Foundation Trust in partnership with King's College London. The study received additional support from the ESRC (ES/N000404/1 to JTB).

## BSGS

We gratefully acknowledge the participation of the twins and their families. This research was supported by NHMRC grants 1010374, 496667 and 1046880, and the National Institutes of Health (NIH) grants GM057091 and GM099568.

## NTR-ACTION cohort

We would like to thank the twins and their family members for their participation. The work is supported by the “Aggression in Children: Unraveling gene-environment interplay to inform Treatment and InterventiON strategies” project (ACTION). ACTION received funding from the European Union Seventh Framework Program (FP7/2007-2013) under grant agreement no 602768. The Netherlands Twin Register is supported by grant NWO 480-15-001/674: Netherlands Twin Registry Repository: researching the interplay between genome and environment, the Avera Institute for Human Genetics and by multiple grants from the Netherlands Organization for Scientific Research (NWO), and the Royal Netherlands Academy of Science Professor Award (PAH/6635) to DIB. JvD is supported by the NWO-funded X-omics project (184.034.019).

## Supplementary Figures

**Figure S1** Comparison of effect sizes in NTR for 243 DMPs across the primary EWAS of MZ versus DZ twins in NTR and sensitivity analyses.

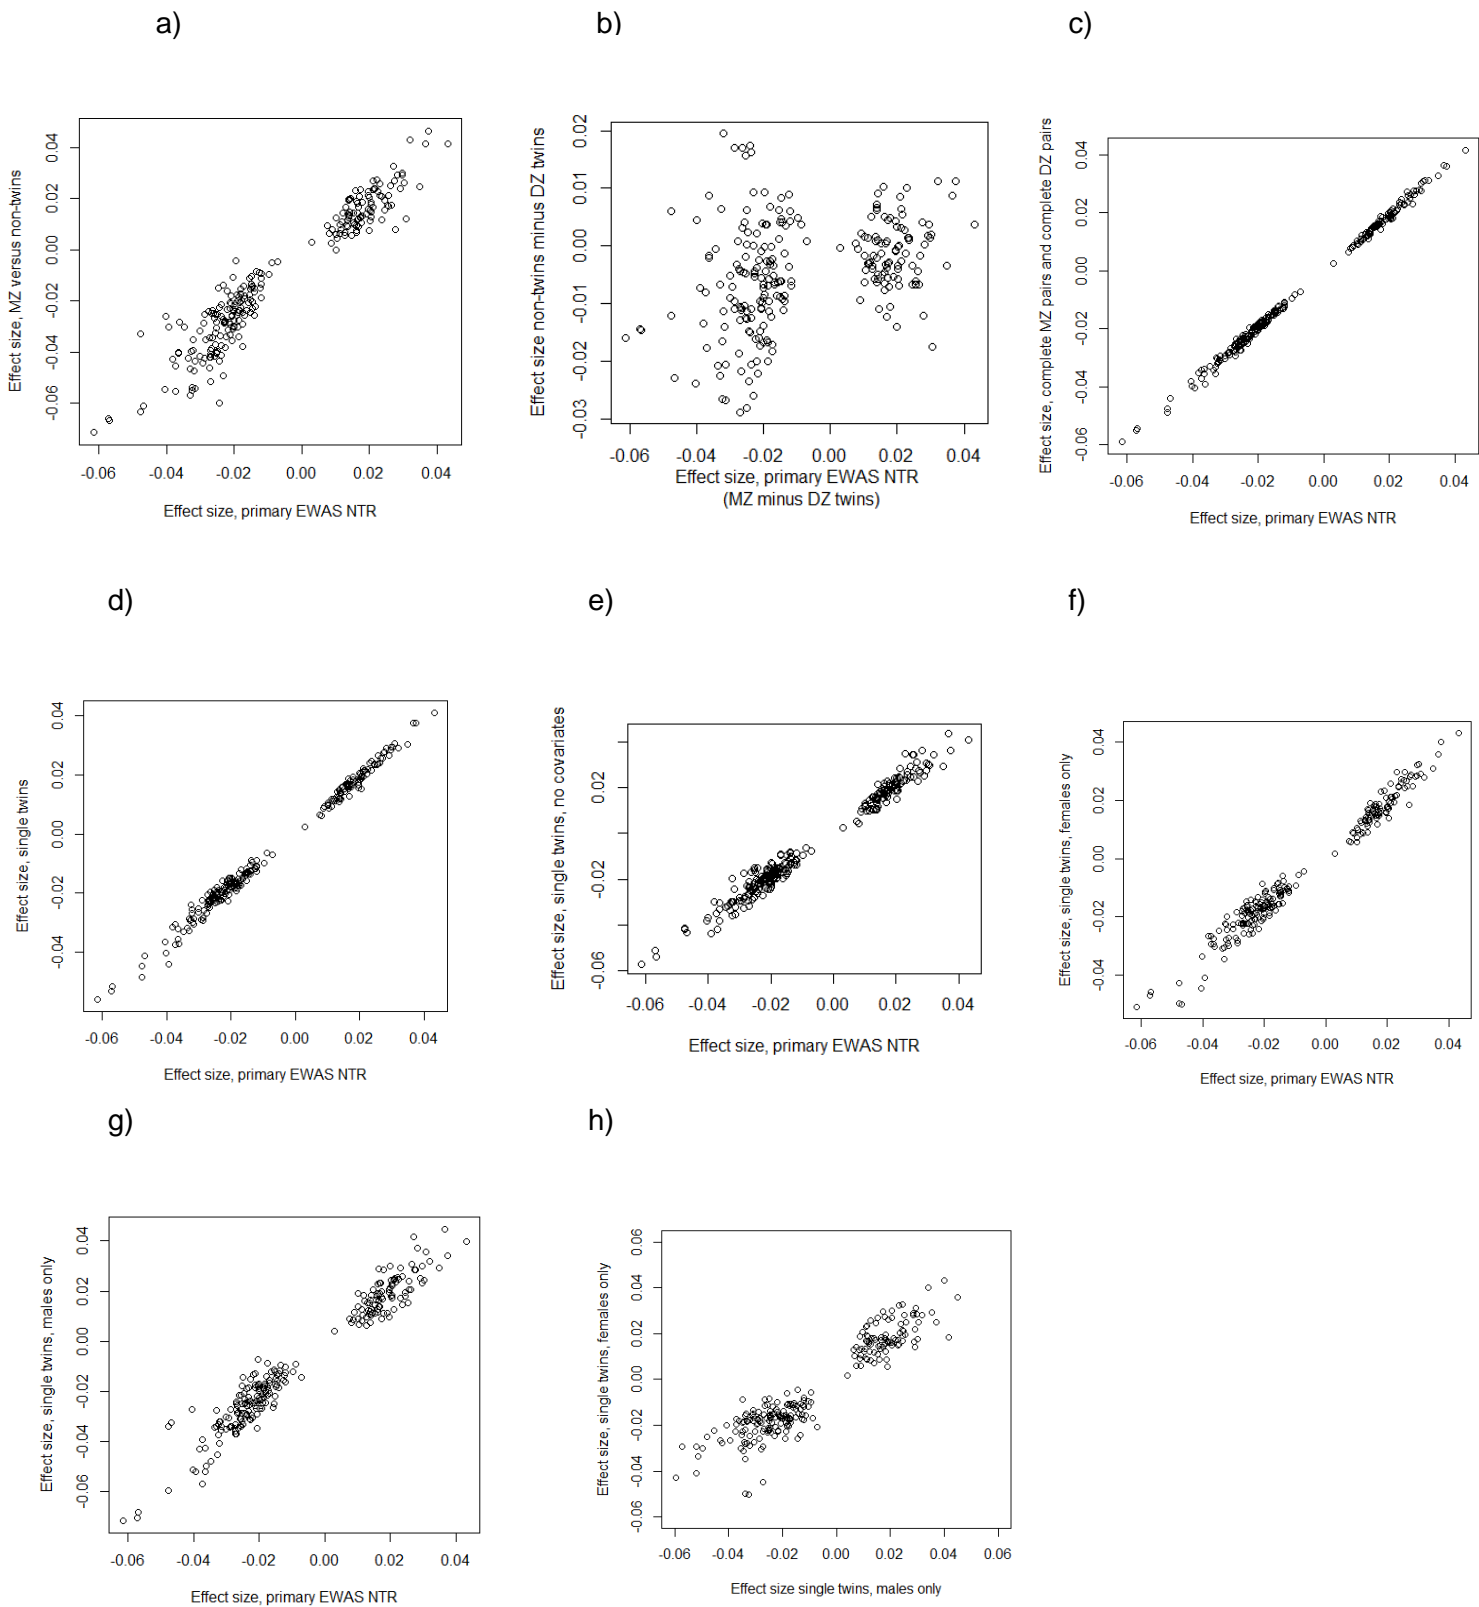



Scatterplots showing the estimates (methylation beta-value difference between MZ twins and controls). X-axis: results from the primary EWAS in NTR (N=1957; controls=DZ twins, participants included: complete DZ pairs and one randomly selected MZ pair). y-axis: Estimate (methylation beta-value difference between MZ twins and controls) from a) Analysis comparing MZ twins to non-twins (parents and siblings), N=1161. b) Analysis comparing non-twins (parents and siblings) to DZ twins, N=1270. c) Analysis in complete MZ pairs and complete DZ pairs (N=2750). c) Analysis in single MZ twins and single DZ twins, randomly selected (N=1538) with a simple linear model (lm function in R). e) Analysis in single MZ twins and single DZ twins, randomly selected (N=1538) with a simple linear model (lm function in R), without any covariates. f) Female-only analysis in single MZ twins and single DZ twins, randomly selected (N=1033) with a simple linear model (lm function in R). g) Male-only analysis in single MZ twins and single DZ twins, randomly selected (N=505) with a simple linear model (lm function in R). h) Effect sizes in males (single twins, N=505, x-axis) versus females (single twins, N=1033, y-axis).

**Figure S2** Comparison of effect sizes in NTR versus BSGS for 243 DMPs

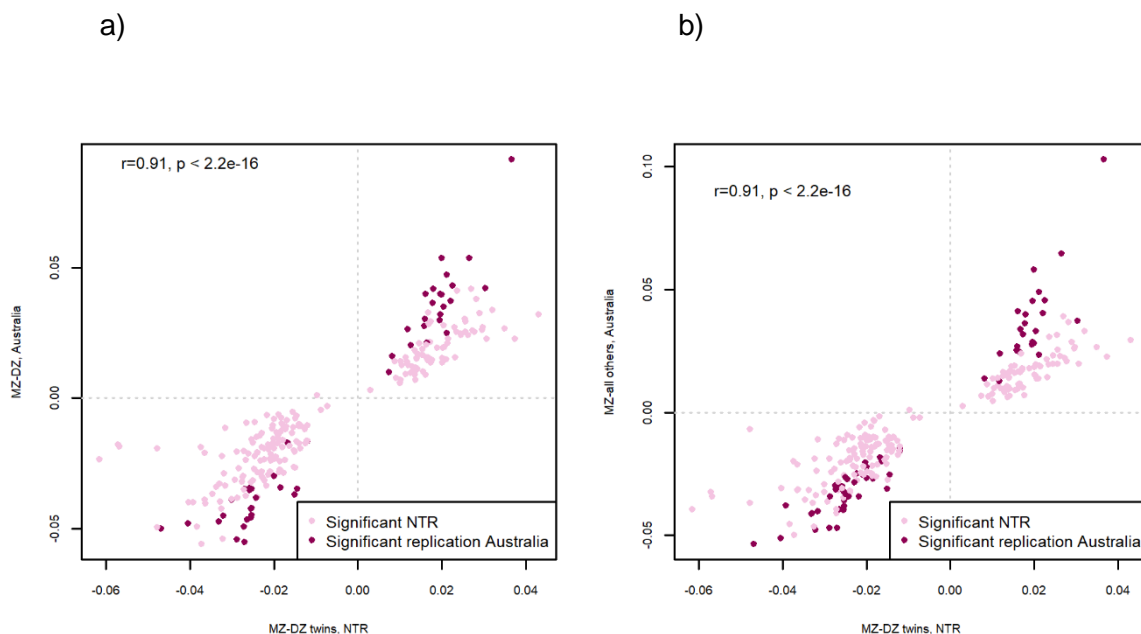

Scatterplot showing the estimates (methylation beta-value difference between MZ twins and controls). X-axis: results from the primary EWAS in NTR (N=1957; controls=DZ twins). y-axis: results from the EWAS in BSGS: a) MZ versus DZ twins (N=356) b) MZ twins versus all other individuals (N=476; all other individuals are DZ twins, siblings, and parents of twins). DMPs that replicate after stringent Bonferroni correction for 243 tests are shown in dark purple.

**Figure S3. Twinning-associated DNA methylation and correlation patterns in 11 differentially methylated regions**

a)

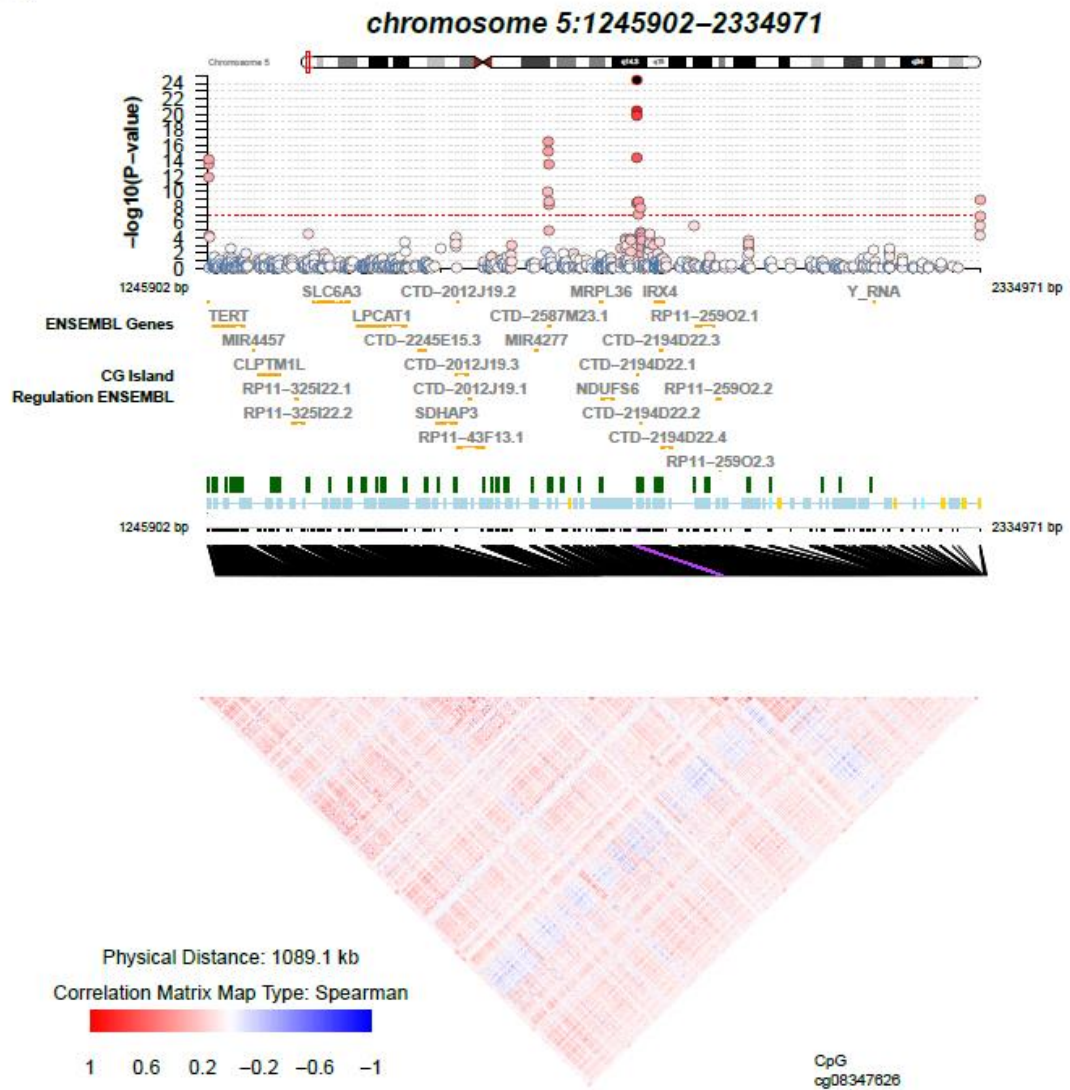

b)

**chromosome 5 [140166589-140781179]**

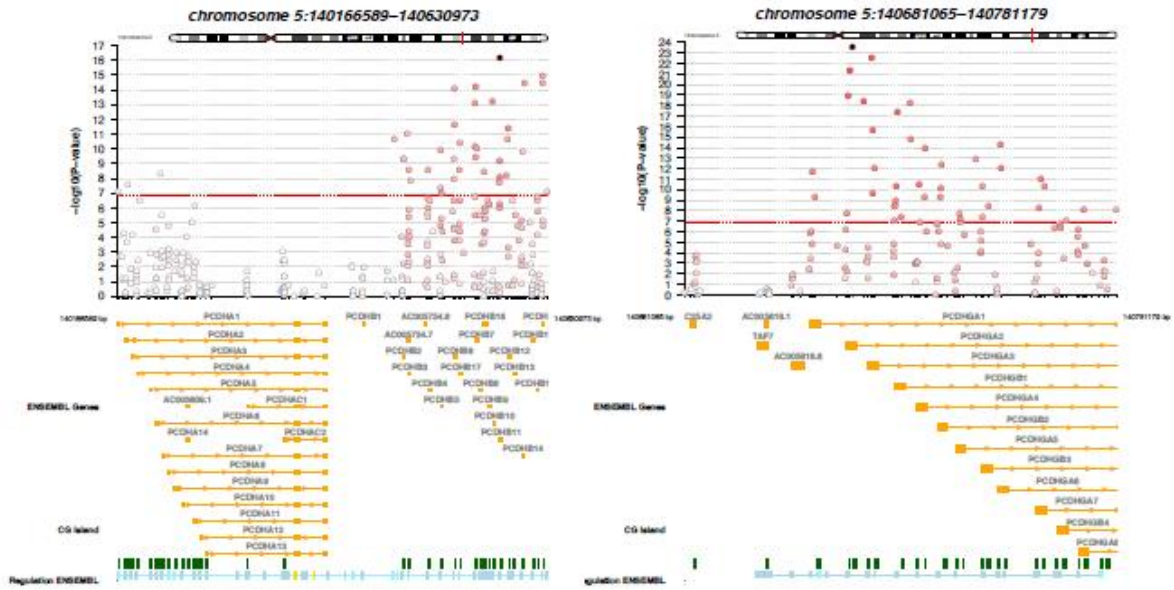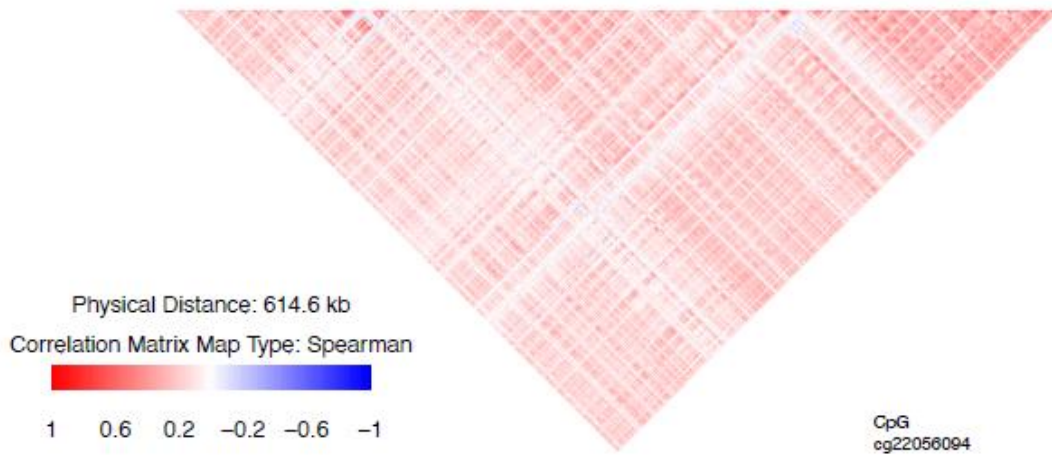

c)

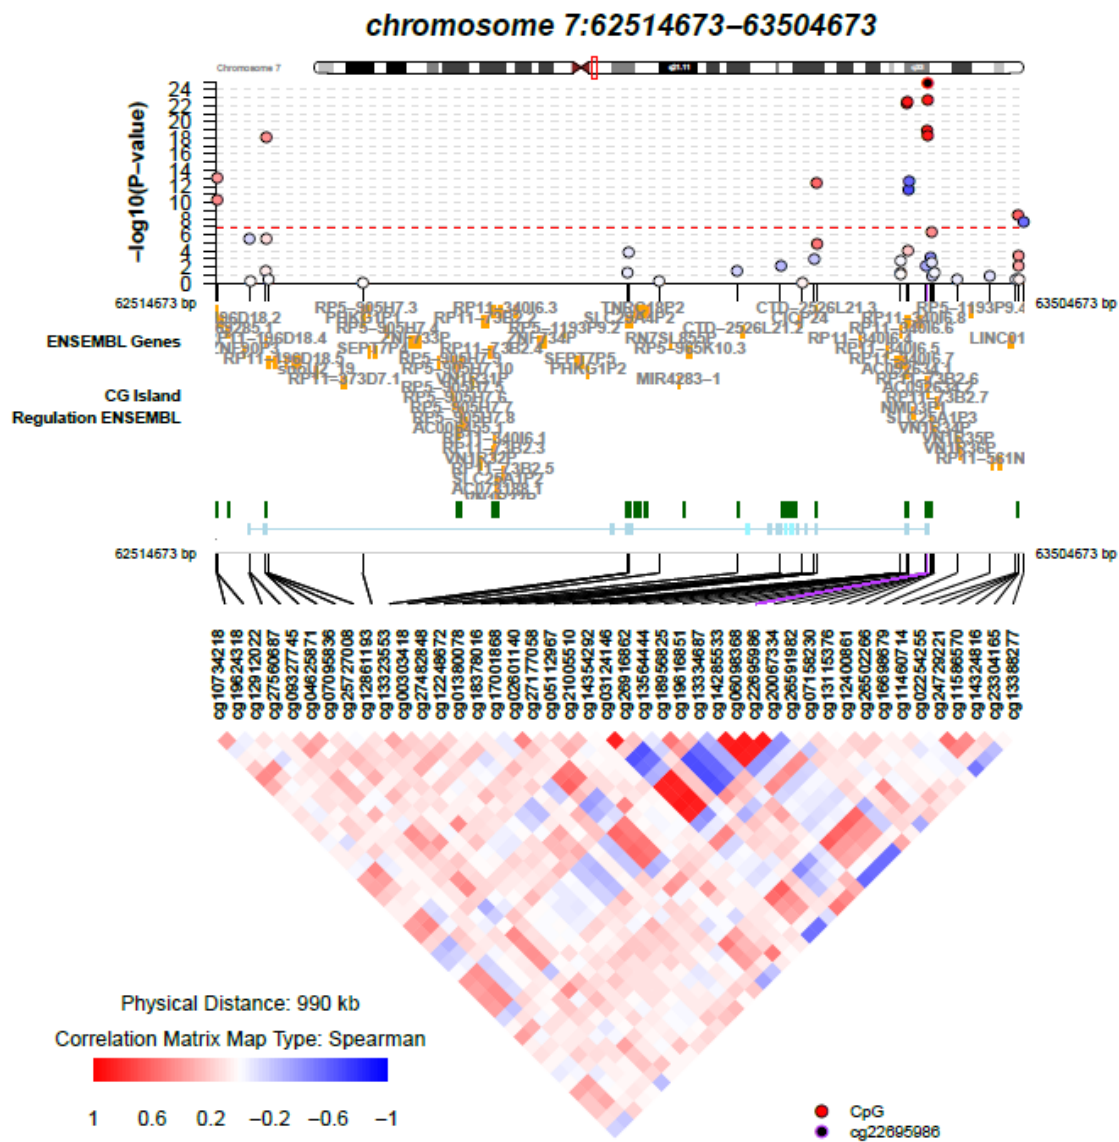

d)

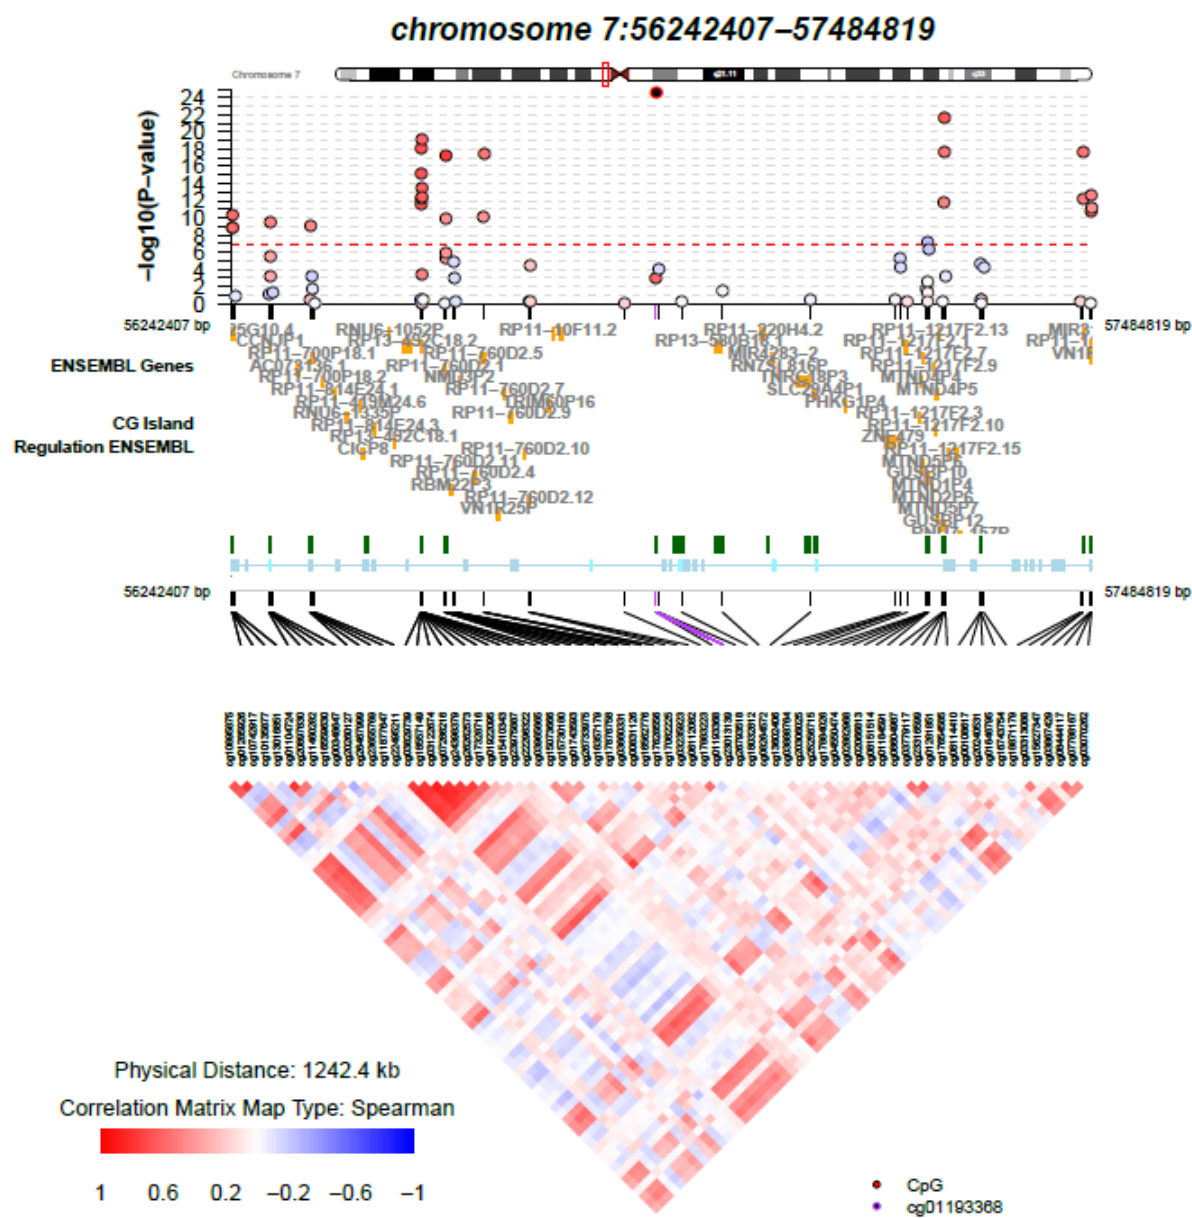



e)

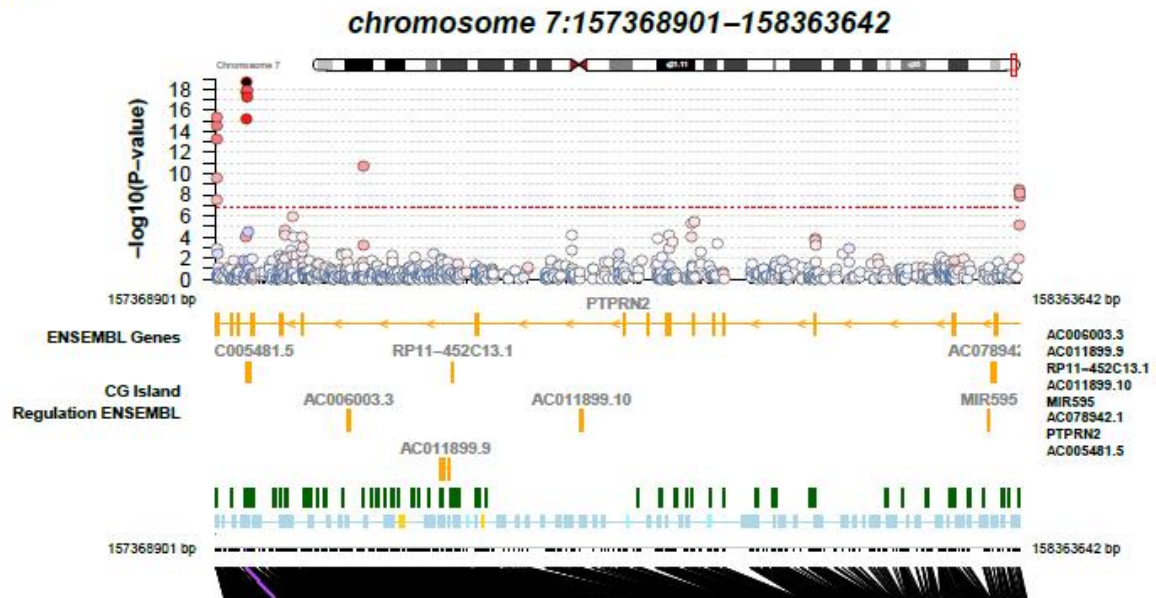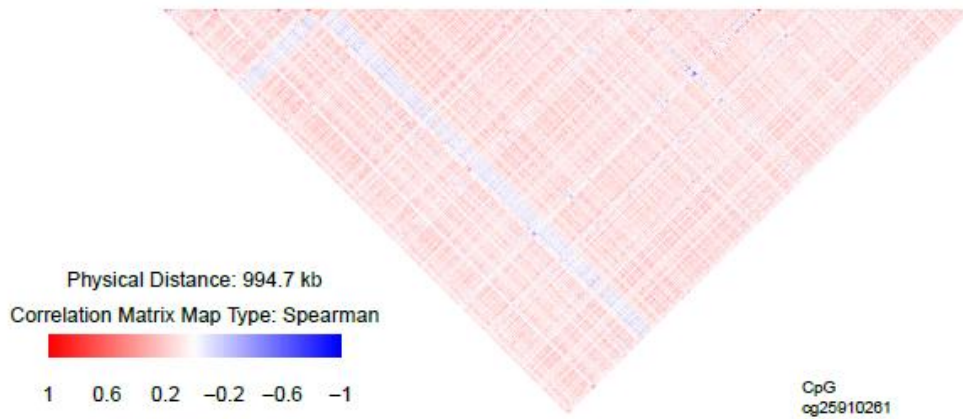

f)

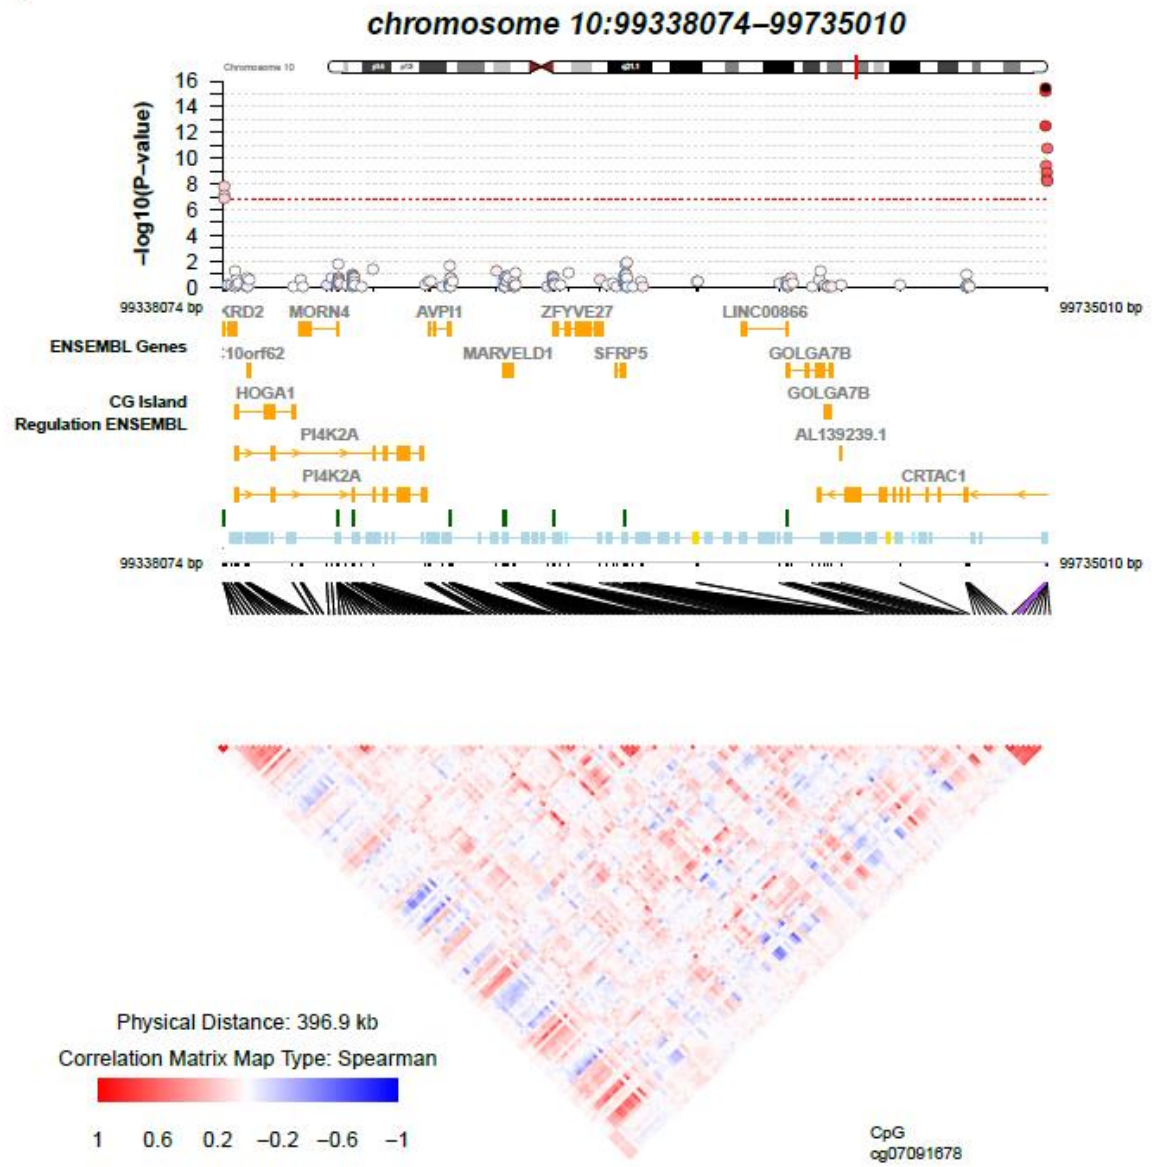

g)

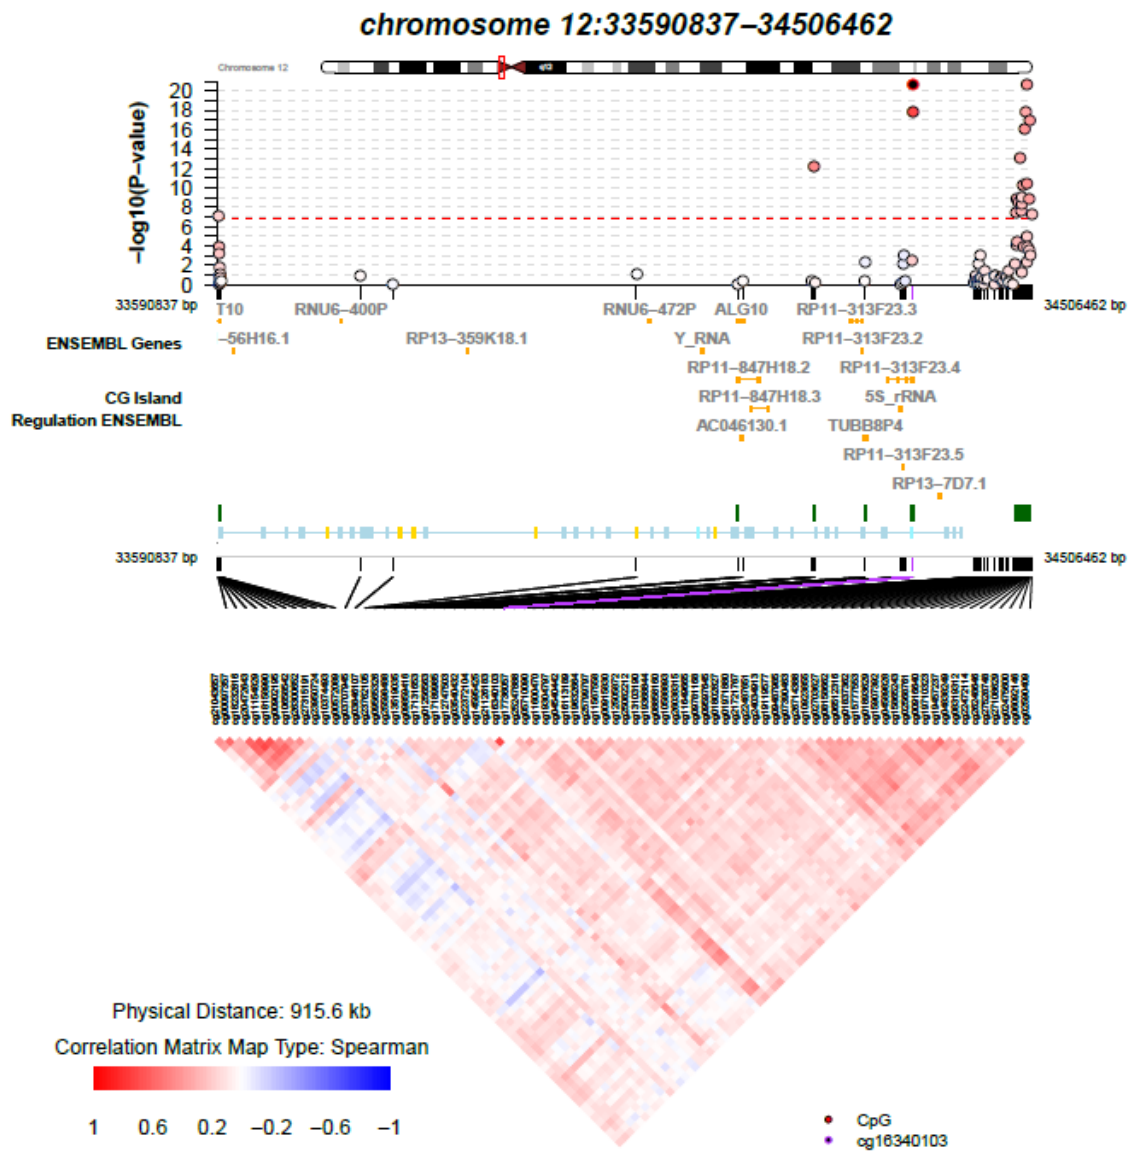



h)

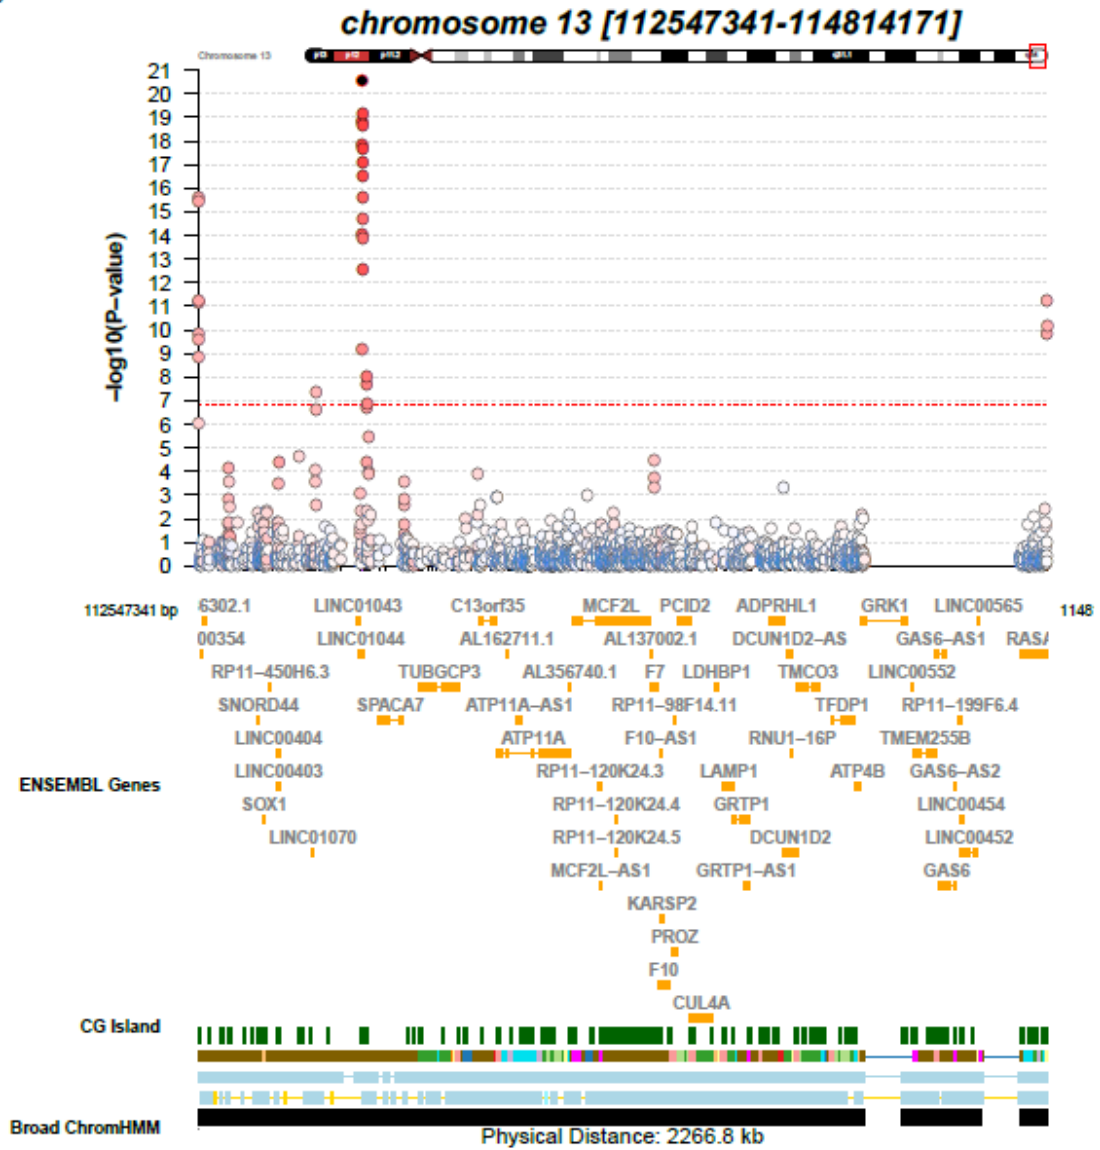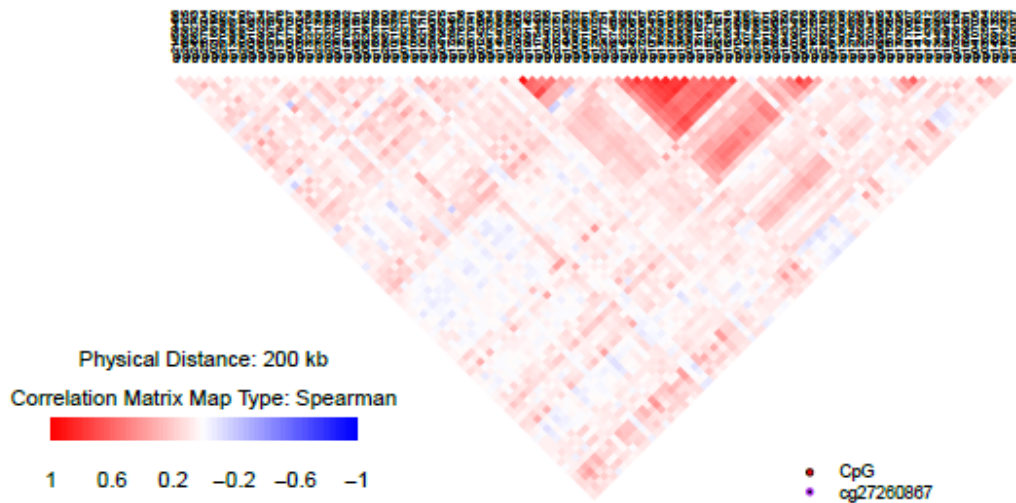





k)

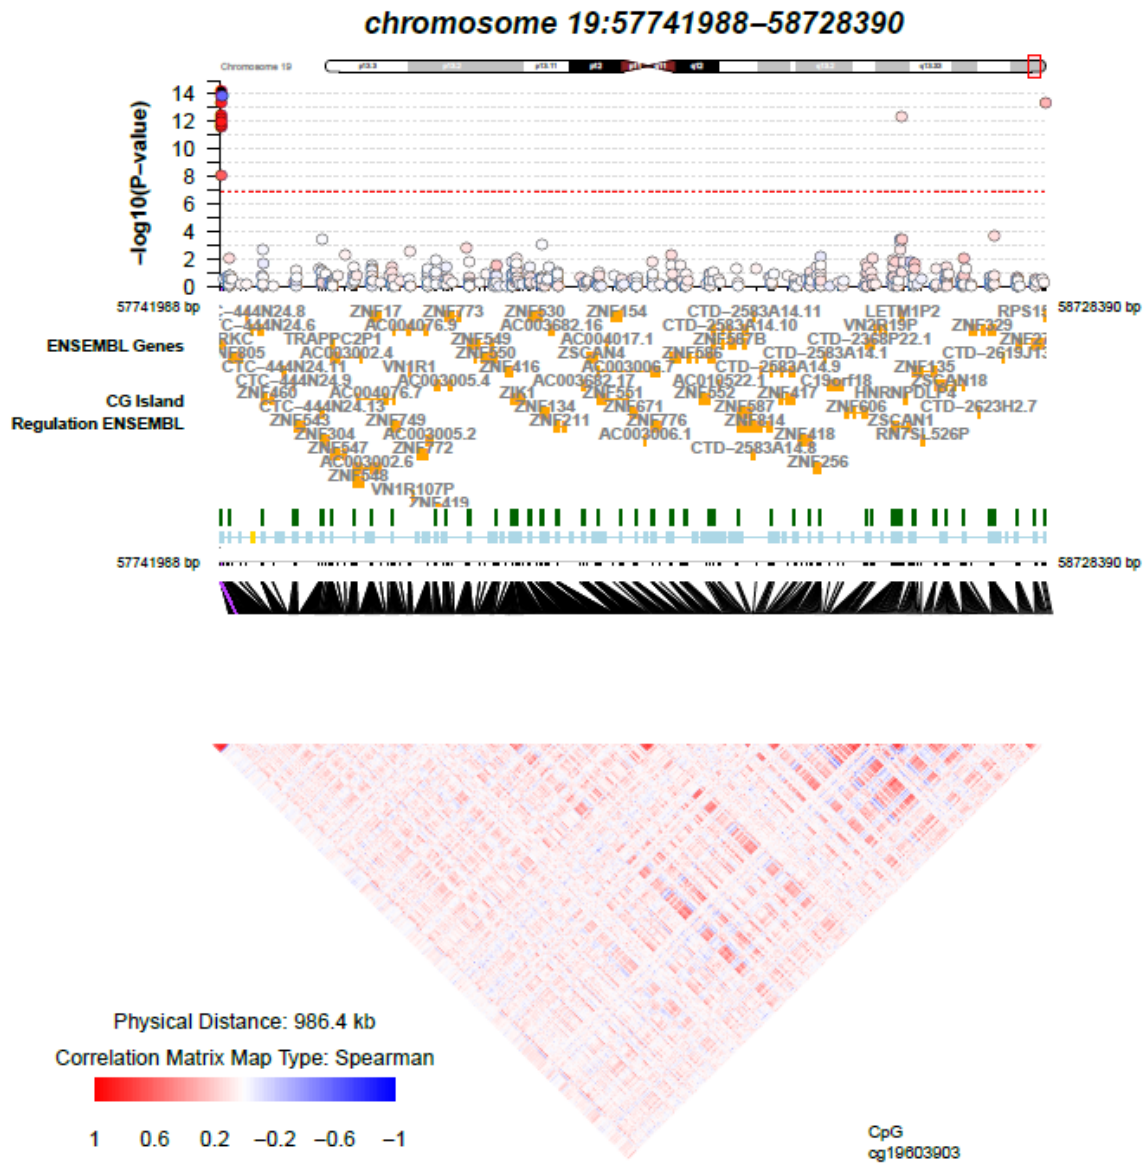

a-k) Plots of exemplary regions that contain multiple CpGs significantly associated with MZ twinning. Regions were defined by selecting a window of 1 Mb around each differentially DMP with the lowest p-value. Plots were created for all regions with 10 or more significant CpGs in this window. The top panel of each plot shows the EWAS meta-analysis p-values for all CpGs in the window, with the most strongly associated CpG highlighted. CpGs above the red horizontal line are epigenome-wide significant in the meta-analysis (total sample size = 5,723). The middle panel shows the genomic coordinates (genome build GRCh37/hg19) and the functional annotation of the region: the ENSEMBL Genes track shows the genes in the genomic region (orange); the CpG Island track shows the location of CpG islands (green); the Regulation ENSEMBL track shows regulatory regions. The bottom panel shows the Spearman correlation between methylation levels of CpGs in the window based on whole blood Illumina 450k methylation data from the NTR (N=3,089 samples). a) chromosome 5:1245902-2334971, 782 CpGs, 18 significant CpGs, mean correlation between significant CpGs 0.328 [range=0.053; 0.919]. b) chromosome 5:140166589-140781179, 476 CpGs, 79 significant CpGs, mean correlation between significant CpGs: 0.283 [range=-0.029; 0.719]. c) chromosome 7:62514673-63504673, 44 CpGs, 14 significant CpGs, mean correlation between significant CpGs 0.195 [range=-0.690; 0.893]. d) chromosome 7:56242407-57484819, 73 CpGs, 26 significant CpGs, mean correlation between significant CpGs 0.446 [range=-0.228; 0.866]. e) chromosome 7:157368901-158363642, 844 CpGs, 14 significant CpGs, mean correlation between significant CpGs 0.420 [range=0.144; 0.954]. f) chromosome 10:99338074-99735010, 153 CpGs, 10 significant CpGs, mean correlation between significant CpGs 0.474 [range=0.106; 0.945]. g) chromosome 12:33590837-34506462, 82 CpGs, 19 significant CpGs, mean correlation between significant CpGs 0.317 [range=0.068;0.700]. h) chromosome 13:112547341-114814171, 1688 CpGs, 27 significant CpGs, mean correlation between significant CpGs 0.400 [range=0.035; 0.931]. i) chromosome 16: 33817457-34809318, 1688 CpGs, 34 significant CpGs, mean correlation between significant CpGs 0.331 [range=0.138; 0.563]. j) chromosome 17:21220055-22203489, 98 CpGs, 11 significant CpGs, mean correlation between significant CpGs 0.381 [range=0.207;0.850]. k) chromosome 19:57741988-58728390, 480 CpGs, 12 significant CpGs, mean correlation between significant CpGs 0.444 [range=-0.592; 0.978].

**Figure S4** Average methylation level in blood and longitudinal correlation for 834 MZ-DMPs.

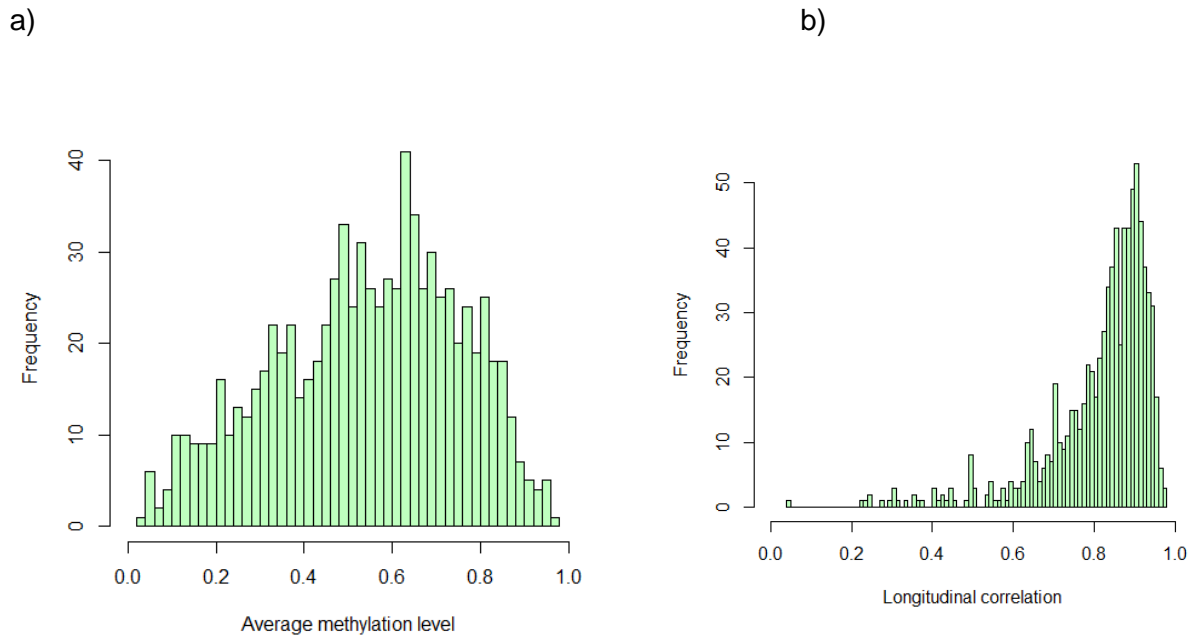

a) Histogram of the average DNA methylation level in blood at 834 MZ-DMPs, based on data from the Netherlands Twin Register (N= 3057 individuals). b) Histogram of the correlations between longitudinal peripheral blood DNA methylation levels collected with an interval of on average 5 years, based on data from the Netherlands Twin Register (N= 31 individuals).

**Figure S5** Heritability and SNP heritability for 834 MZ-DMPs based on whole blood methylation data.

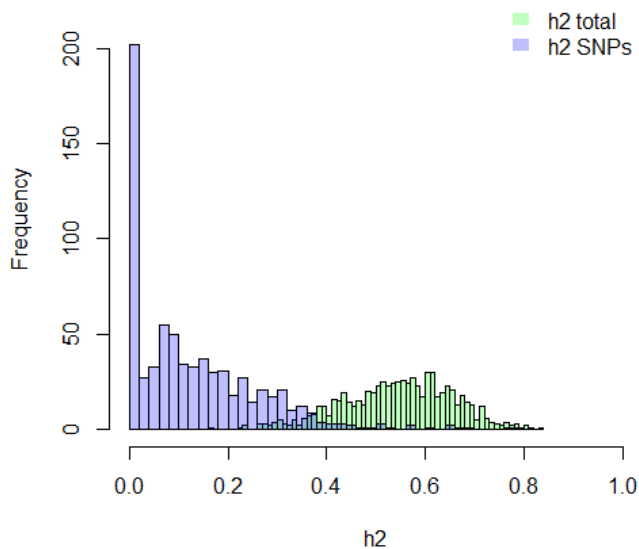

Histogram of the total heritability ( $h^2$ ) and SNP heritability ( $h^2$  SNPs) of DNA methylation level in blood at 834 MZ-DMPs, based on data from the Netherlands Twin Register (N= 2,603 individuals).

**Figure S6** Twin correlations and ADE twin model estimates for 834 MZ-DMPs based on whole blood methylation data.

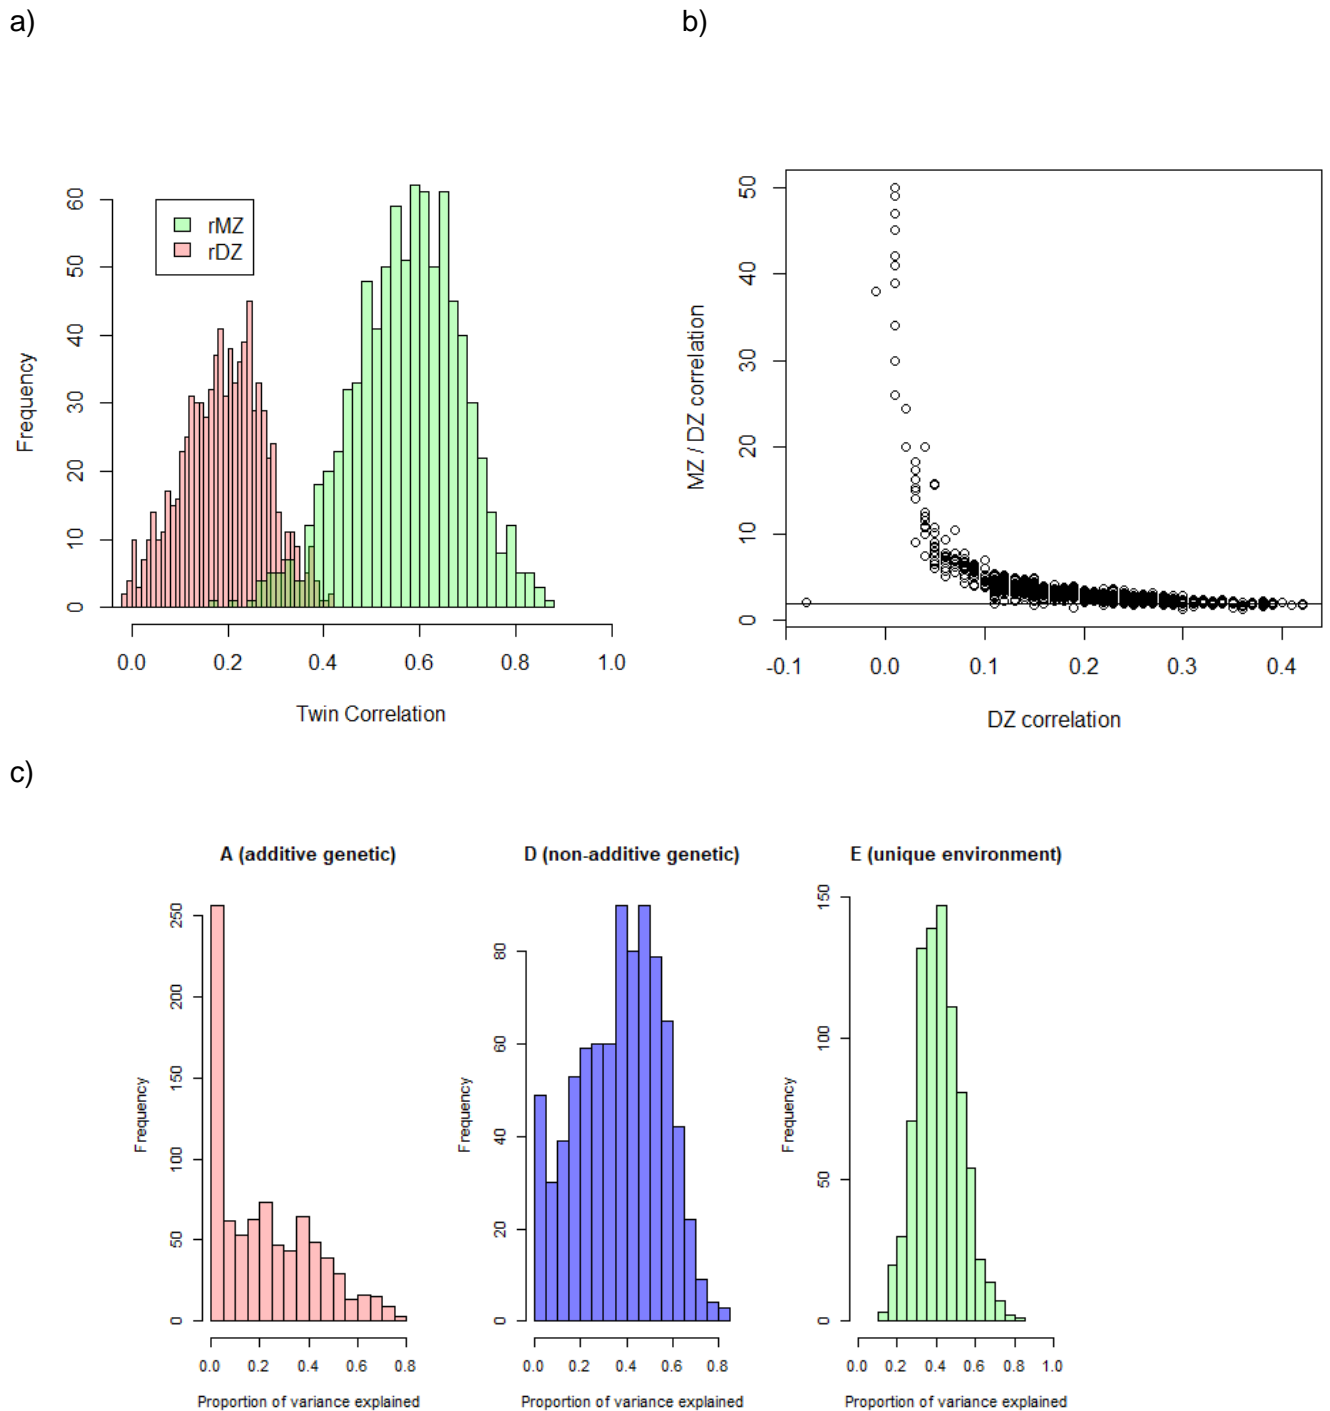

Twin correlations and ADE model estimates for DNA methylation level in blood at 834 MZ-DMPs, based on data from the Netherlands Twin Register. a) Histograms of the correlation between DNA methylation levels of monozygotic twins ( $r_{MZ}$ , N MZ pairs= 769), and dizygotic twins ( $r_{DZ}$ , N DZ pairs=424). b) Scatterplot of the DZ twin correlation (x-axis) versus the ratio of the twin correlations ( $r_{MZ}/r_{DZ}$ ; y-axis). c) Proportion of variance in DNA methylation level explained by additive genetic effects, non-additive genetic effects, and unique environment.



**Figure S7** Within-pair differences in MZ pairs at ten exemplary MZ-DMPs based on whole blood methylation data.

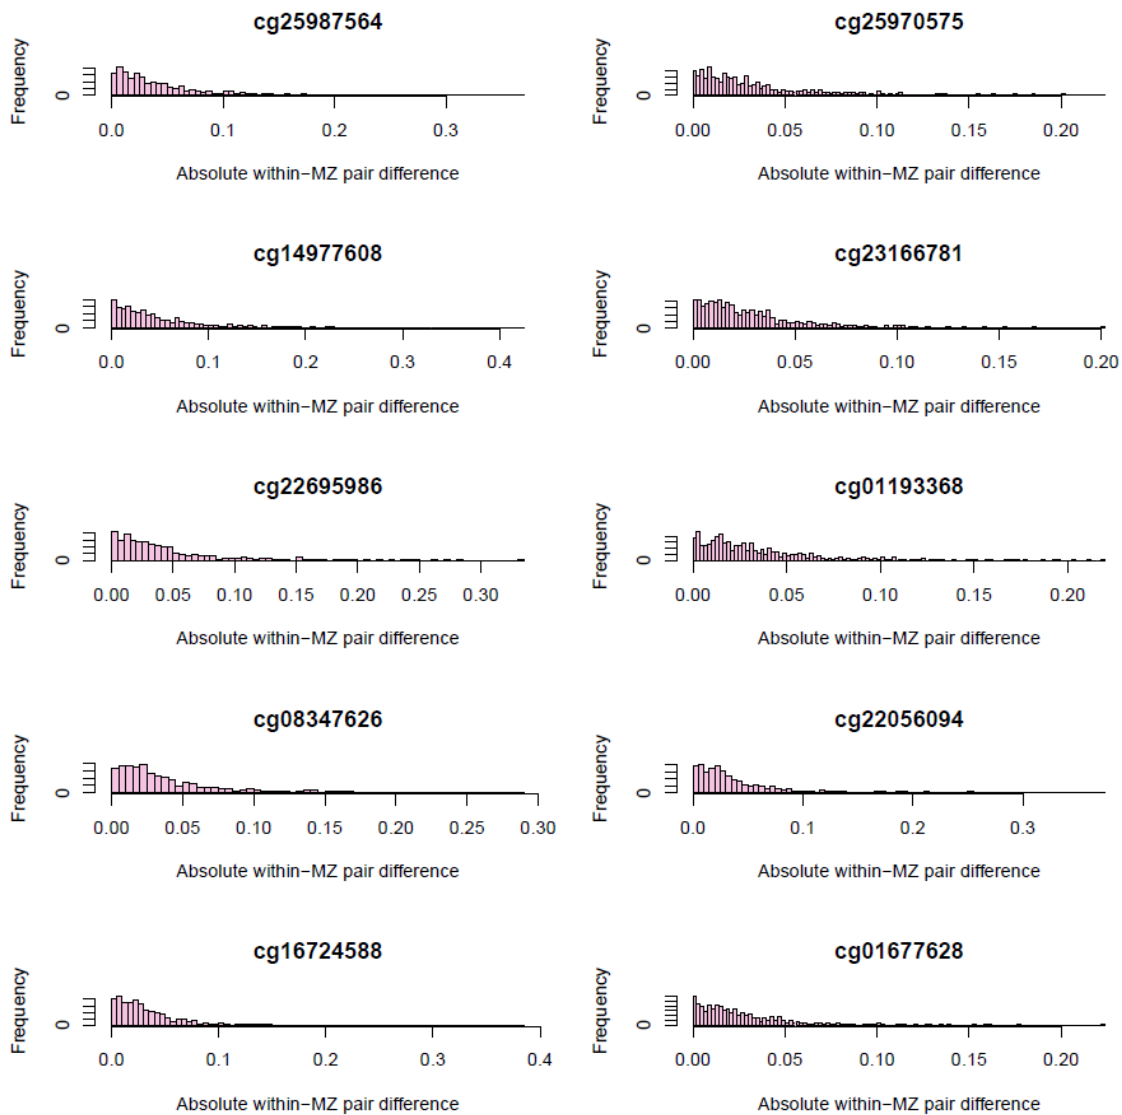

Histograms of absolute within MZ pair differences in DNA methylation levels are shown for ten exemplary CpGs that were randomly selected from the total set of 834 MZ-DMPs, and illustrate the skewed distribution of within-pair differences. Within-pair differences were calculated for 761 MZ twin pairs, based on whole blood methylation data from the Netherlands Twin Register. The figures show absolute within-pair differences of residual methylation levels, which were obtained after adjusting methylation beta-values for covariates.



**Figure S8** MZ twin scatterplots (twin 1 versus twin 2) of ten exemplary MZ-DMPs based on whole blood methylation data.

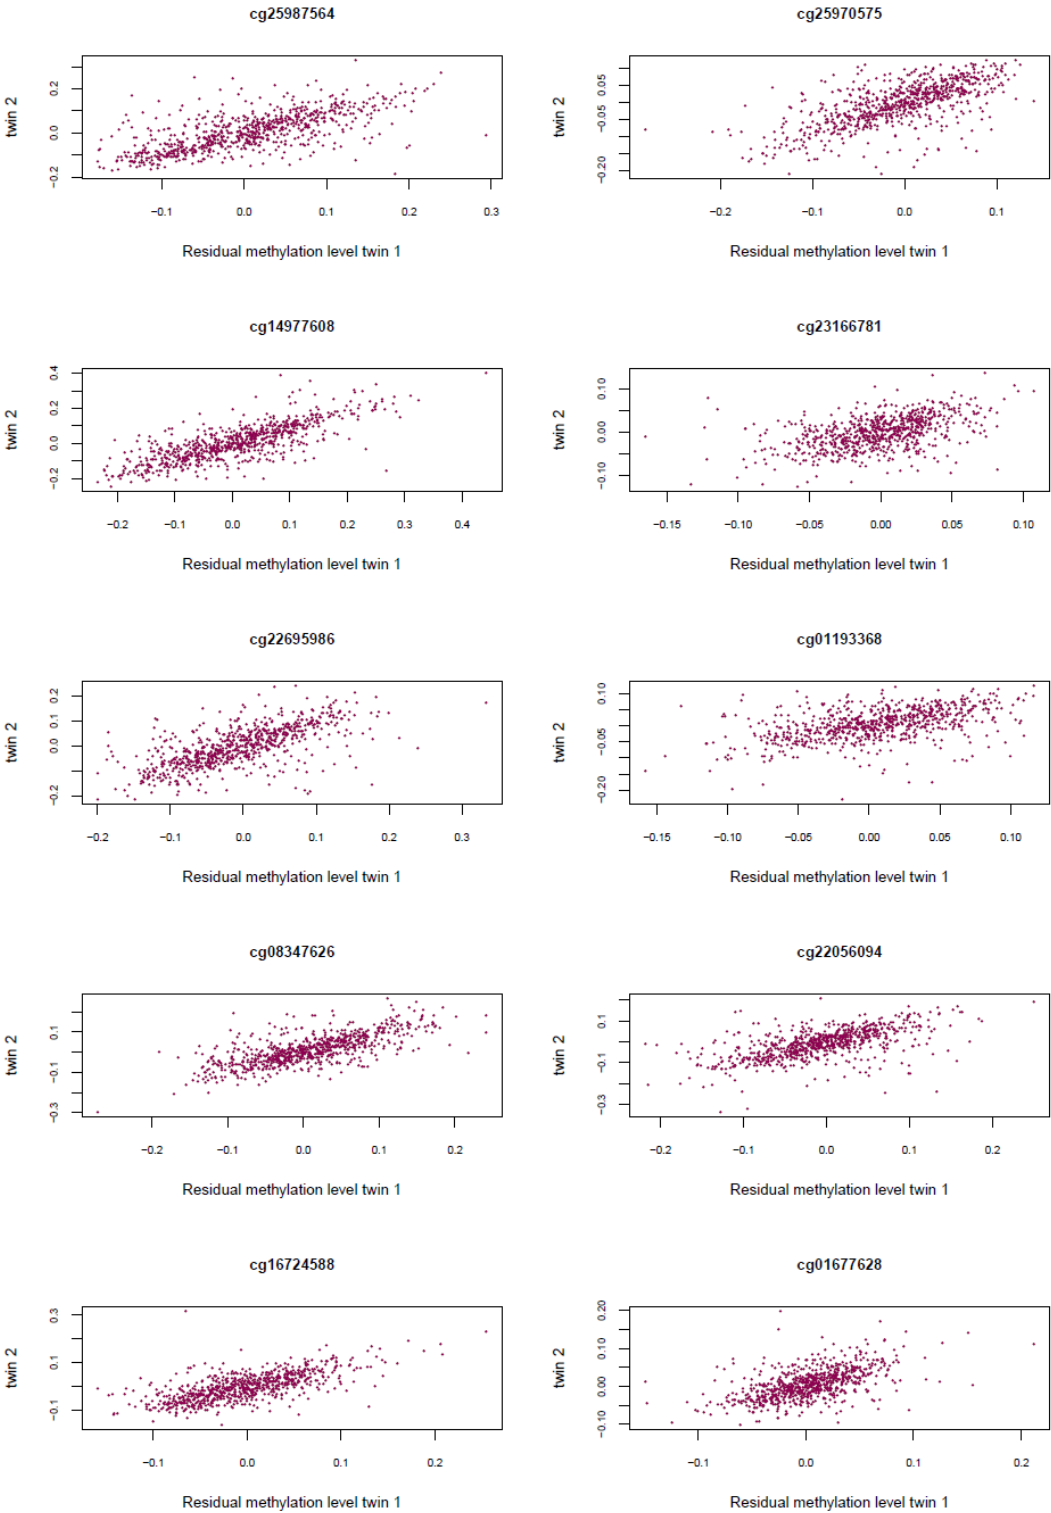

Scatterplots are shown for ten exemplary CpGs that were randomly selected from the total set of 834 MZ-DMPs. Data are shown for 761 MZ twin pairs (each dot represents one twin pair), based on whole blood methylation data from the Netherlands Twin Register. The figures show residual methylation levels, which were obtained after adjusting methylation beta-values for covariates. The value of twin 1 is shown on the x-axis and the value of twin 2 is shown on the y-axis.

**Figure S9** Within-pair and between-pair differences at 834 MZ-DMPs

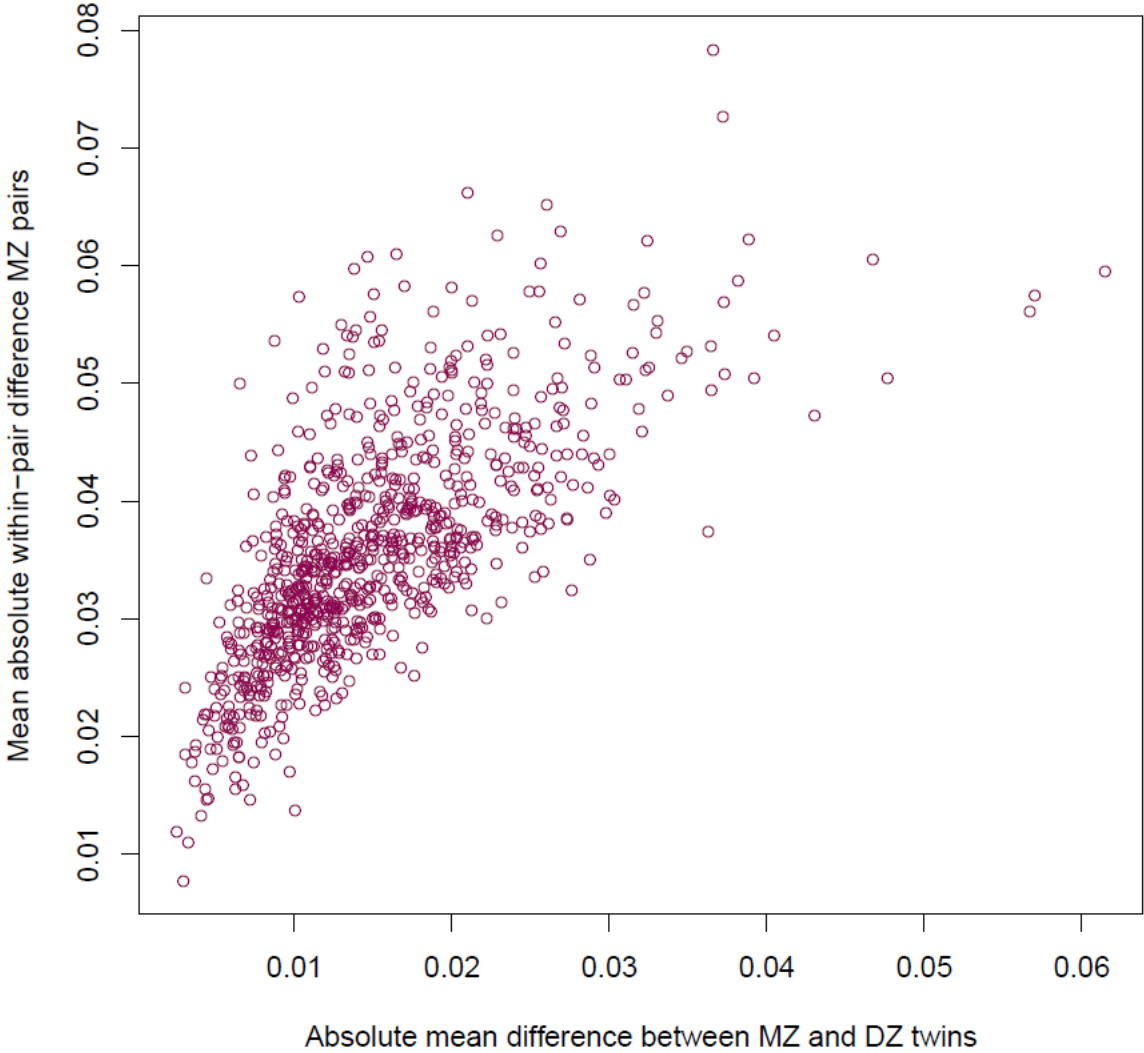

The x-axis shows the absolute mean difference in DNA methylation level between MZ and DZ twins and the y-axis shows the absolute within-pair difference in MZ twins at 834 MZ-DMPs, based on whole blood methylation data from the Netherlands Twin Register. Mean differences between MZ and DZ twins were taken from the primary EWAS analysis in NTR. Mean differences within MZ pairs were calculated on residual methylation levels, which were obtained after adjusting methylation beta-values for covariates.

**Figure S10** Distribution of within-pair differences in MZ pairs at 834 MZ-DMPs

a)

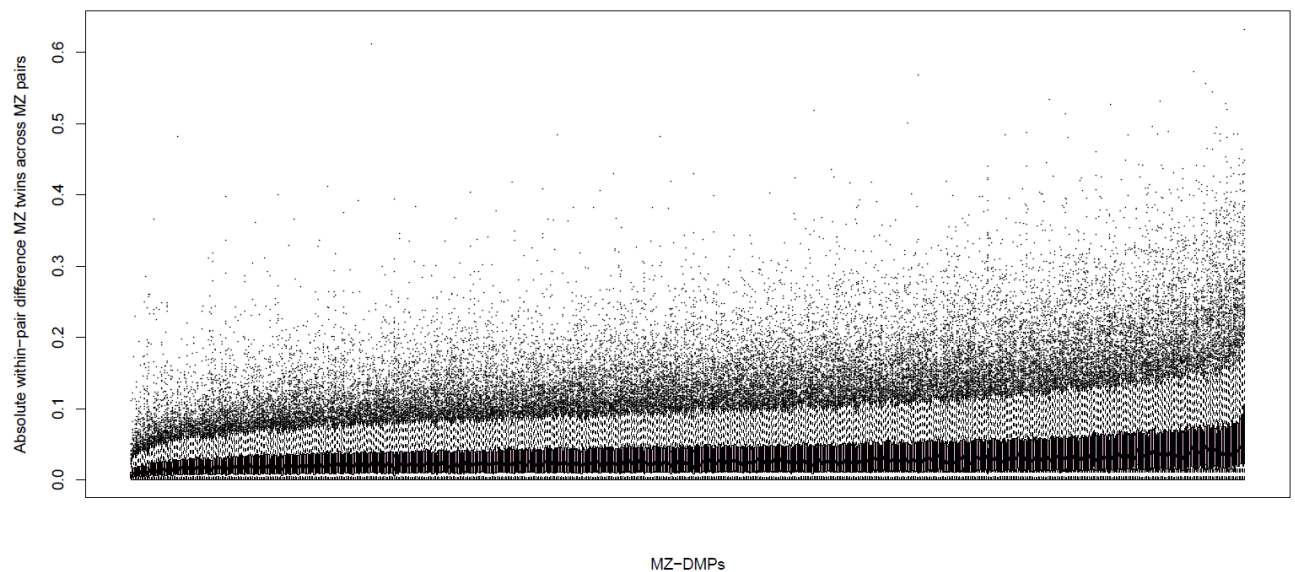

b)

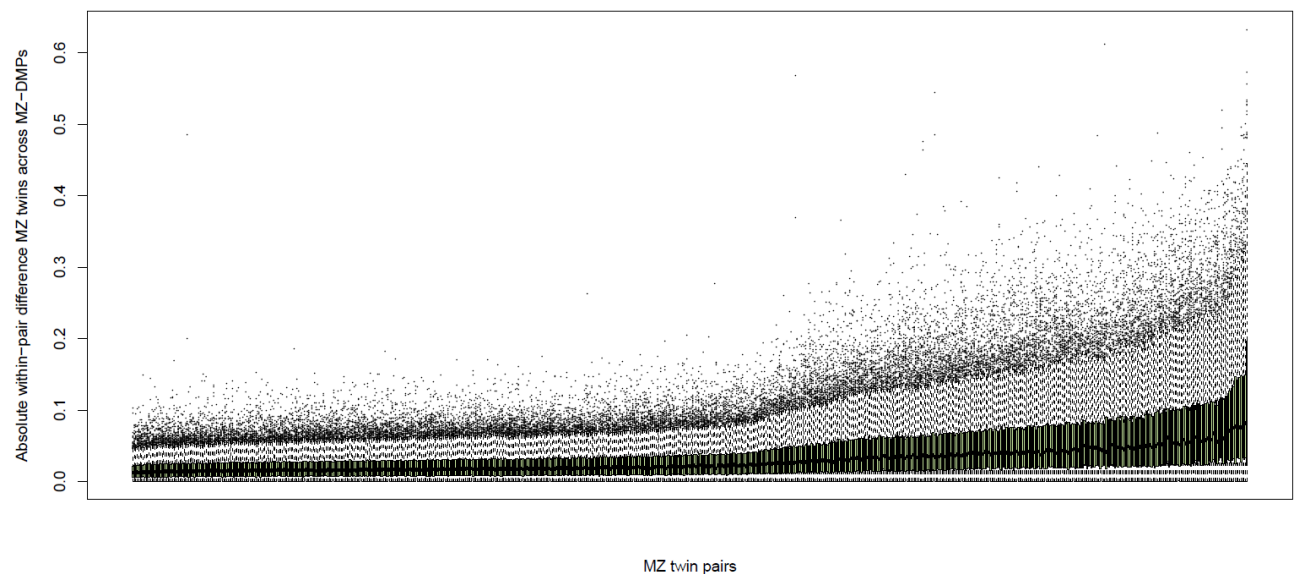

Figure a shows boxplots of within-pair differences across pairs for each CpG. Figure b shows boxplots of within-pair differences across CpGs for each MZ pair. Within-pair differences were calculated for 761 MZ twin pairs, based on whole blood methylation data from the Netherlands Twin Register. The figures show absolute within-pair differences of residual methylation levels, which were obtained after adjusting methylation beta-values for covariates. Thick horizontal lines within boxes denote the median, box edges show the 25<sup>th</sup> and 75<sup>th</sup> percentiles, whiskers denote 1.5 $\times$ interquartile range (IQR), and dots any datapoints outside this range.

**Figure S11** Twin correlations in buccal cell DNA methylation data from an independent group of children from the Netherlands Twin Register.

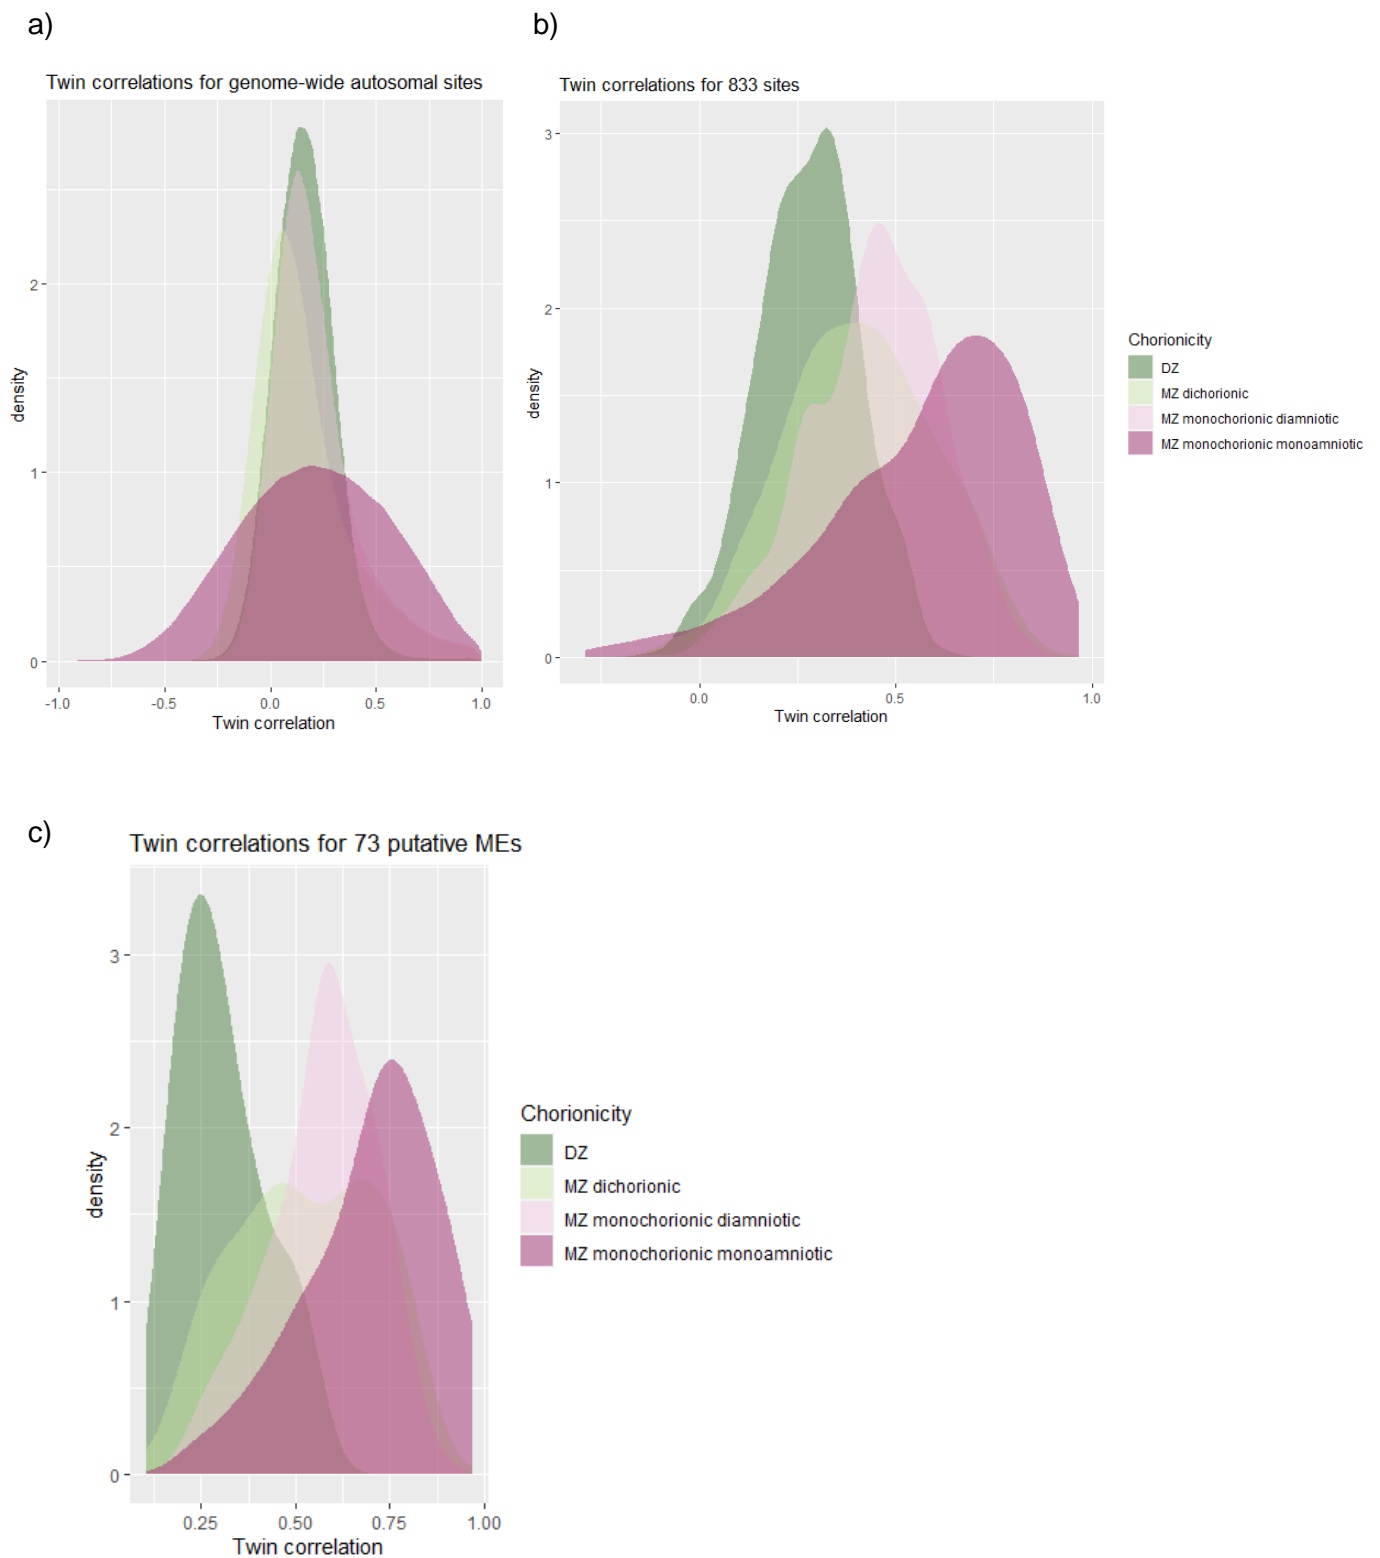

a) Density plots of twin correlations for genome-wide autosomal methylation sites. b) Twin correlations for the 833 MZ-DMPs that were present in the buccal DNA methylation dataset. c) Twin correlations for previously published putative metastable epi-alleles. MZ= Monozygotic twins. DZ=Dizygotic twins. ME=metastable epi-alleles.

$-\log_{10}$  binomial p-value

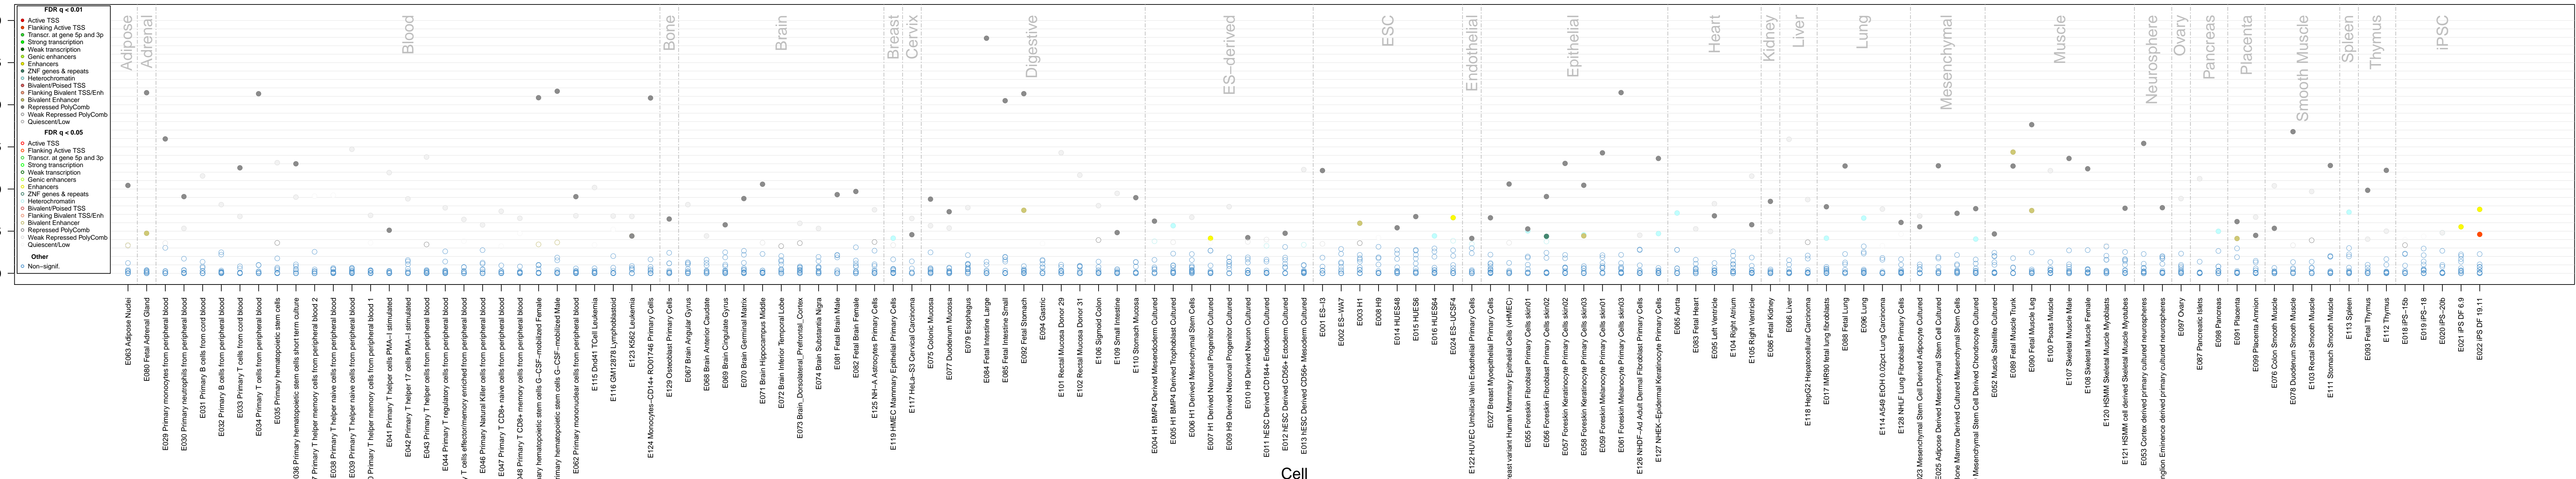

**Figure S12** Chromatin state enrichment analysis of MZ-hypomethylated sites (previous page)

Results from the enrichment analysis of 15 Epigenomic Roadmap Chromatin States for MZ-hypomethylated sites.



$-\log_{10}$  binomial p-value

100

80

60

40

20

0

- FDR q < 0.01**
- Active TSS
  - Flanking Active TSS
  - Transcr. at gene 5p and 3p
  - Strong transcription
  - Weak transcription
  - Genic enhancers
  - Enhancers
  - ZNF genes & repeats
  - Heterochromatin
  - Bivalent/Poised TSS
  - Flanking Bivalent TSS/Enh
  - Bivalent Enhancer
  - Repressed PolyComb
  - Weak Repressed PolyComb
  - Quiescent/Low

- FDR q < 0.05**
- Active TSS
  - Flanking Active TSS
  - Transcr. at gene 5p and 3p
  - Strong transcription
  - Weak transcription
  - Genic enhancers
  - Enhancers
  - ZNF genes & repeats
  - Heterochromatin
  - Bivalent/Poised TSS
  - Flanking Bivalent TSS/Enh
  - Bivalent Enhancer
  - Repressed PolyComb
  - Weak Repressed PolyComb
  - Quiescent/Low

- Other**
- Non-signif.

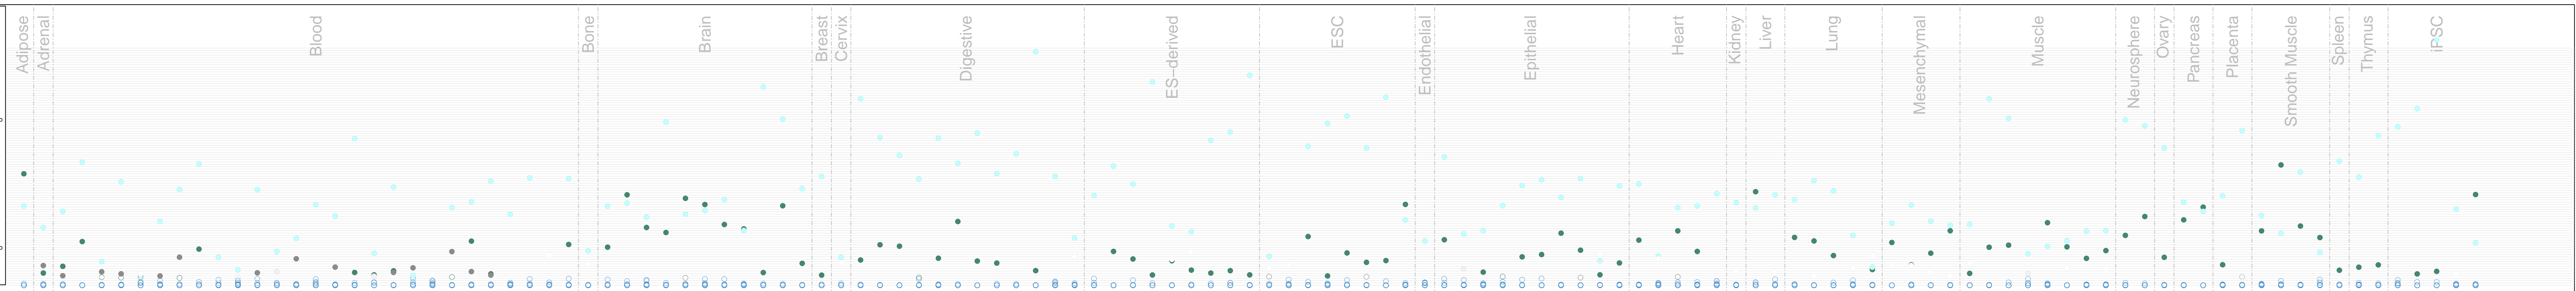

Cell

- E063 Adipose Nuclei
- E060 Fetal Adrenal Gland
- E029 Primary monocytes from peripheral blood
- E030 Primary neutrophils from peripheral blood
- E031 Primary B cells from cord blood
- E032 Primary B cells from peripheral blood
- E033 Primary T cells from cord blood
- E034 Primary T cells from peripheral blood
- E035 Primary hematopoietic stem cells
- E036 Primary hematopoietic stem cells short term culture
- E037 Primary T helper memory cells from peripheral blood 2
- E038 Primary T helper naive cells from peripheral blood
- E039 Primary T helper naive cells from peripheral blood
- E040 Primary T helper memory cells from peripheral blood 1
- E041 Primary T helper cells PMA-I stimulated
- E042 Primary T helper 17 cells PMA-I stimulated
- E043 Primary T helper cells from peripheral blood
- E044 Primary T regulatory cells from peripheral blood
- E045 Primary T cells effector/memory enriched from peripheral blood
- E046 Primary Natural Killer cells from peripheral blood
- E047 Primary T CD8+ naive cells from peripheral blood
- E048 Primary T CD8+ memory cells from peripheral blood
- Primary hematopoietic stem cells G-CSF-mobilized Female
- Primary hematopoietic stem cells G-CSF-mobilized Male
- E062 Primary mononuclear cells from peripheral blood
- E115 Dnd41 TCell Leukemia
- E116 GM12878 Lymphoblastoid
- E123 K562 Leukemia
- E124 Monocytes-CD14+ RO01746 Primary Cells
- E129 Osteoblast Primary Cells
- E067 Brain Angular Gyrus
- E068 Brain Anterior Caudate
- E069 Brain Cingulate Gyrus
- E070 Brain Germinal Matrix
- E071 Brain Hippocampus Middle
- E072 Brain Inferior Temporal Lobe
- E073 Brain\_Dorsolateral\_Prefrontal\_Cortex
- E074 Brain Substantia Nigra
- E081 Fetal Brain Male
- E082 Fetal Brain Female
- E125 NH-A Astrocytes Primary Cells
- E119 HMEC Mammary Epithelial Primary Cells
- E117 HeLa-S3 Cervical Carcinoma
- E075 Colonic Mucosa
- E077 Duodenum Mucosa
- E079 Esophagus
- E084 Fetal Intestine Large
- E085 Fetal Intestine Small
- E092 Fetal Stomach
- E094 Gastric
- E101 Rectal Mucosa Donor 29
- E102 Rectal Mucosa Donor 31
- E106 Sigmoid Colon
- E109 Small Intestine
- E110 Stomach Mucosa
- E004 H1 BMP4 Derived Mesoderm Cultured
- E005 H1 BMP4 Derived Trophoblast Cultured
- E006 H1 Derived Mesenchymal Stem Cells
- E007 H1 Derived Neuronal Progenitor Cultured
- E009 H9 Derived Neuronal Progenitor Cultured
- E010 H9 Derived Neuron Cultured
- E011 hESC Derived CD184+ Endoderm Cultured
- E012 hESC Derived CD56+ Ectoderm Cultured
- E013 hESC Derived CD56+ Mesoderm Cultured
- E001 ES-I3
- E002 ES-WA7
- E003 H1
- E008 H9
- E014 HUES48
- E015 HUES6
- E016 HUES64
- E024 ES-UCSF4
- E122 HUVEC Umbilical Vein Endothelial Primary Cells
- E027 Breast Myoepithelial Primary Cells
- B Breast variant Human Mammary Epithelial Cells (vHMEC)
- E055 Foreskin Fibroblast Primary Cells skin01
- E056 Foreskin Fibroblast Primary Cells skin02
- E057 Foreskin Keratinocyte Primary Cells skin02
- E058 Foreskin Keratinocyte Primary Cells skin03
- E059 Foreskin Melanocyte Primary Cells skin01
- E061 Foreskin Melanocyte Primary Cells skin03
- E126 NHDF-Ad Adult Dermal Fibroblast Primary Cells
- E127 NHEK-Epidermal Keratinocyte Primary Cells
- E065 Aorta
- E083 Fetal Heart
- E095 Left Ventricle
- E104 Right Atrium
- E105 Right Ventricle
- E086 Fetal Kidney
- E066 Liver
- E118 HepG2 Hepatocellular Carcinoma
- E017 IMR90 fetal lung fibroblasts
- E088 Fetal Lung
- E096 Lung
- E114 A549 EIOH 0.02pct Lung Carcinoma
- E128 NHLF Lung Fibroblast Primary Cells
- Mesenchymal Stem Cell Derived Adipocyte Cultured
- E052 Muscle Satellite Cultured
- E089 Fetal Muscle Trunk
- E090 Fetal Muscle Leg
- E100 Psoas Muscle
- E107 Skeletal Muscle Male
- E108 Skeletal Muscle Female
- E120 HSMM Skeletal Muscle Myoblasts
- E120 HSMM cell derived Skeletal Muscle Myotubes
- E053 Cortex derived primary cultured neurospheres
- Ganglion Eminence derived primary cultured neurospheres
- E097 Ovary
- E087 Pancreatic Islets
- E098 Pancreas
- E091 Placenta
- E099 Placenta Amnion
- E076 Colon Smooth Muscle
- E078 Duodenum Smooth Muscle
- E103 Rectal Smooth Muscle
- E111 Stomach Smooth Muscle
- E113 Spleen
- E093 Fetal Thymus
- E112 Thymus
- E018 IPS-15b
- E019 IPS-18
- E020 IPS-20b
- E021 IPS DF 6.9
- E022 IPS DF 19.11

**Figure S13** Chromatin state enrichment analysis of MZ-hypermethylated sites (previous page)

Results from the enrichment analysis of 15 Epigenomic Roadmap Chromatin States for MZ-hypermethylated sites.

**Figure S14** QQ-plots from the EWAS meta-analysis of MZ versus DZ twins, highlighting methylation sites within imprinted DMRs.

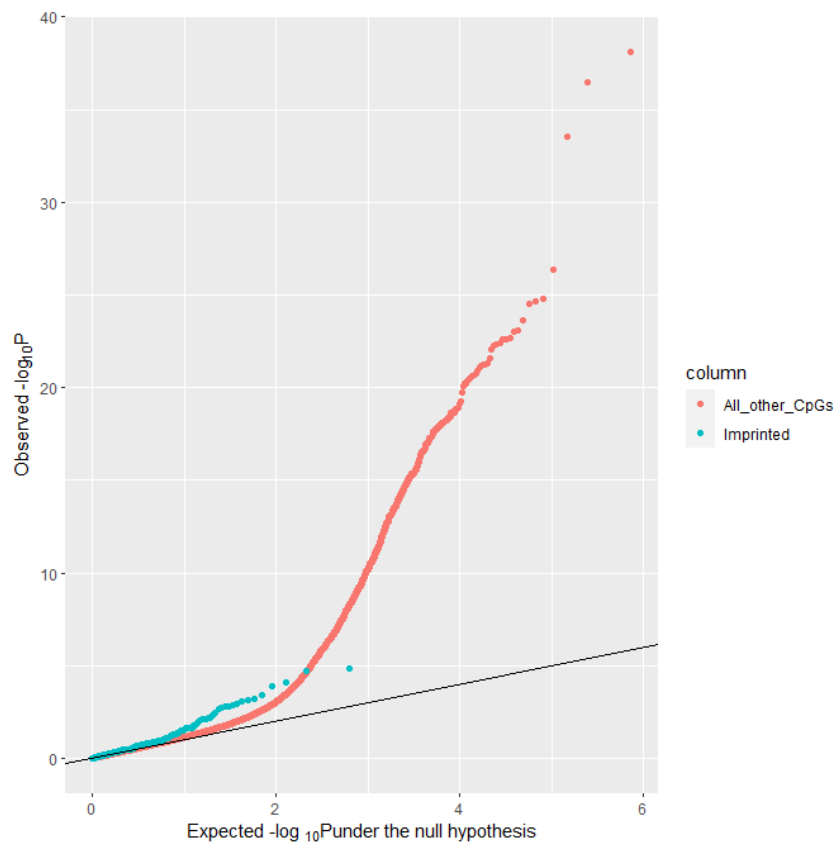

P-values from the EWAS meta-analysis (sample size = 5,723) are shown.



**Figure S15** QQ-plots from the EWAS meta-analysis of MZ versus DZ twins, highlighting methylation sites within previously published putative metastable epi-alleles.

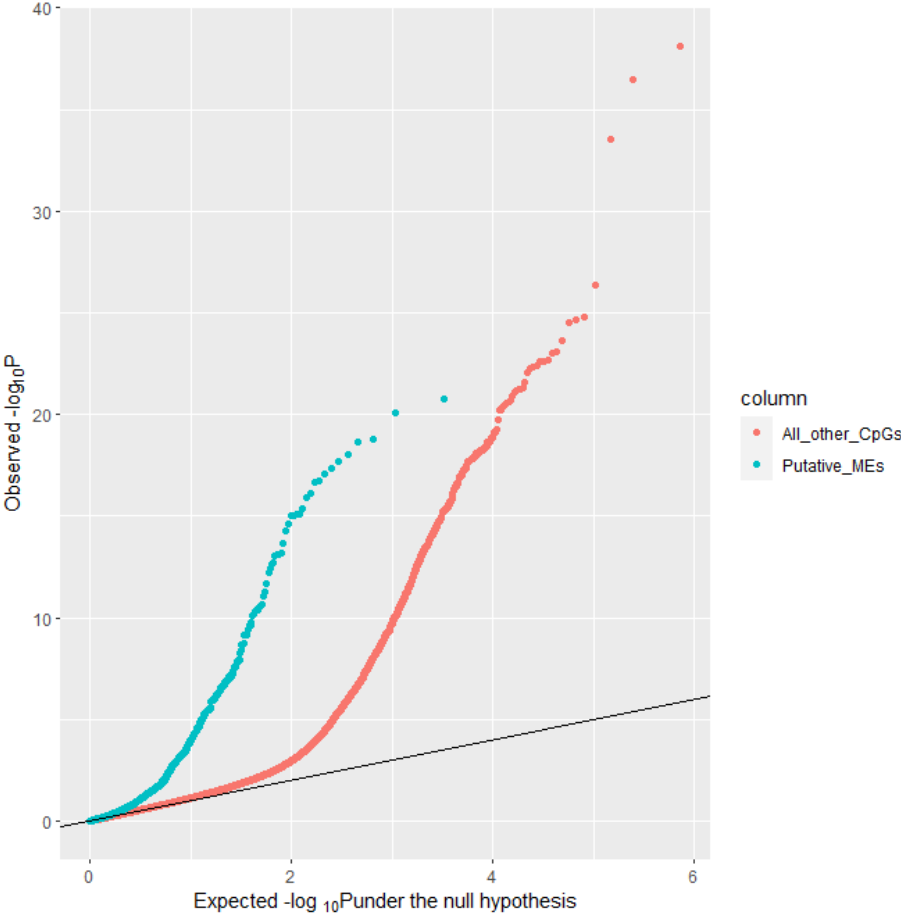

P-values from the EWAS meta-analysis (sample size = 5,723) are shown.

# Probeset TF Associations

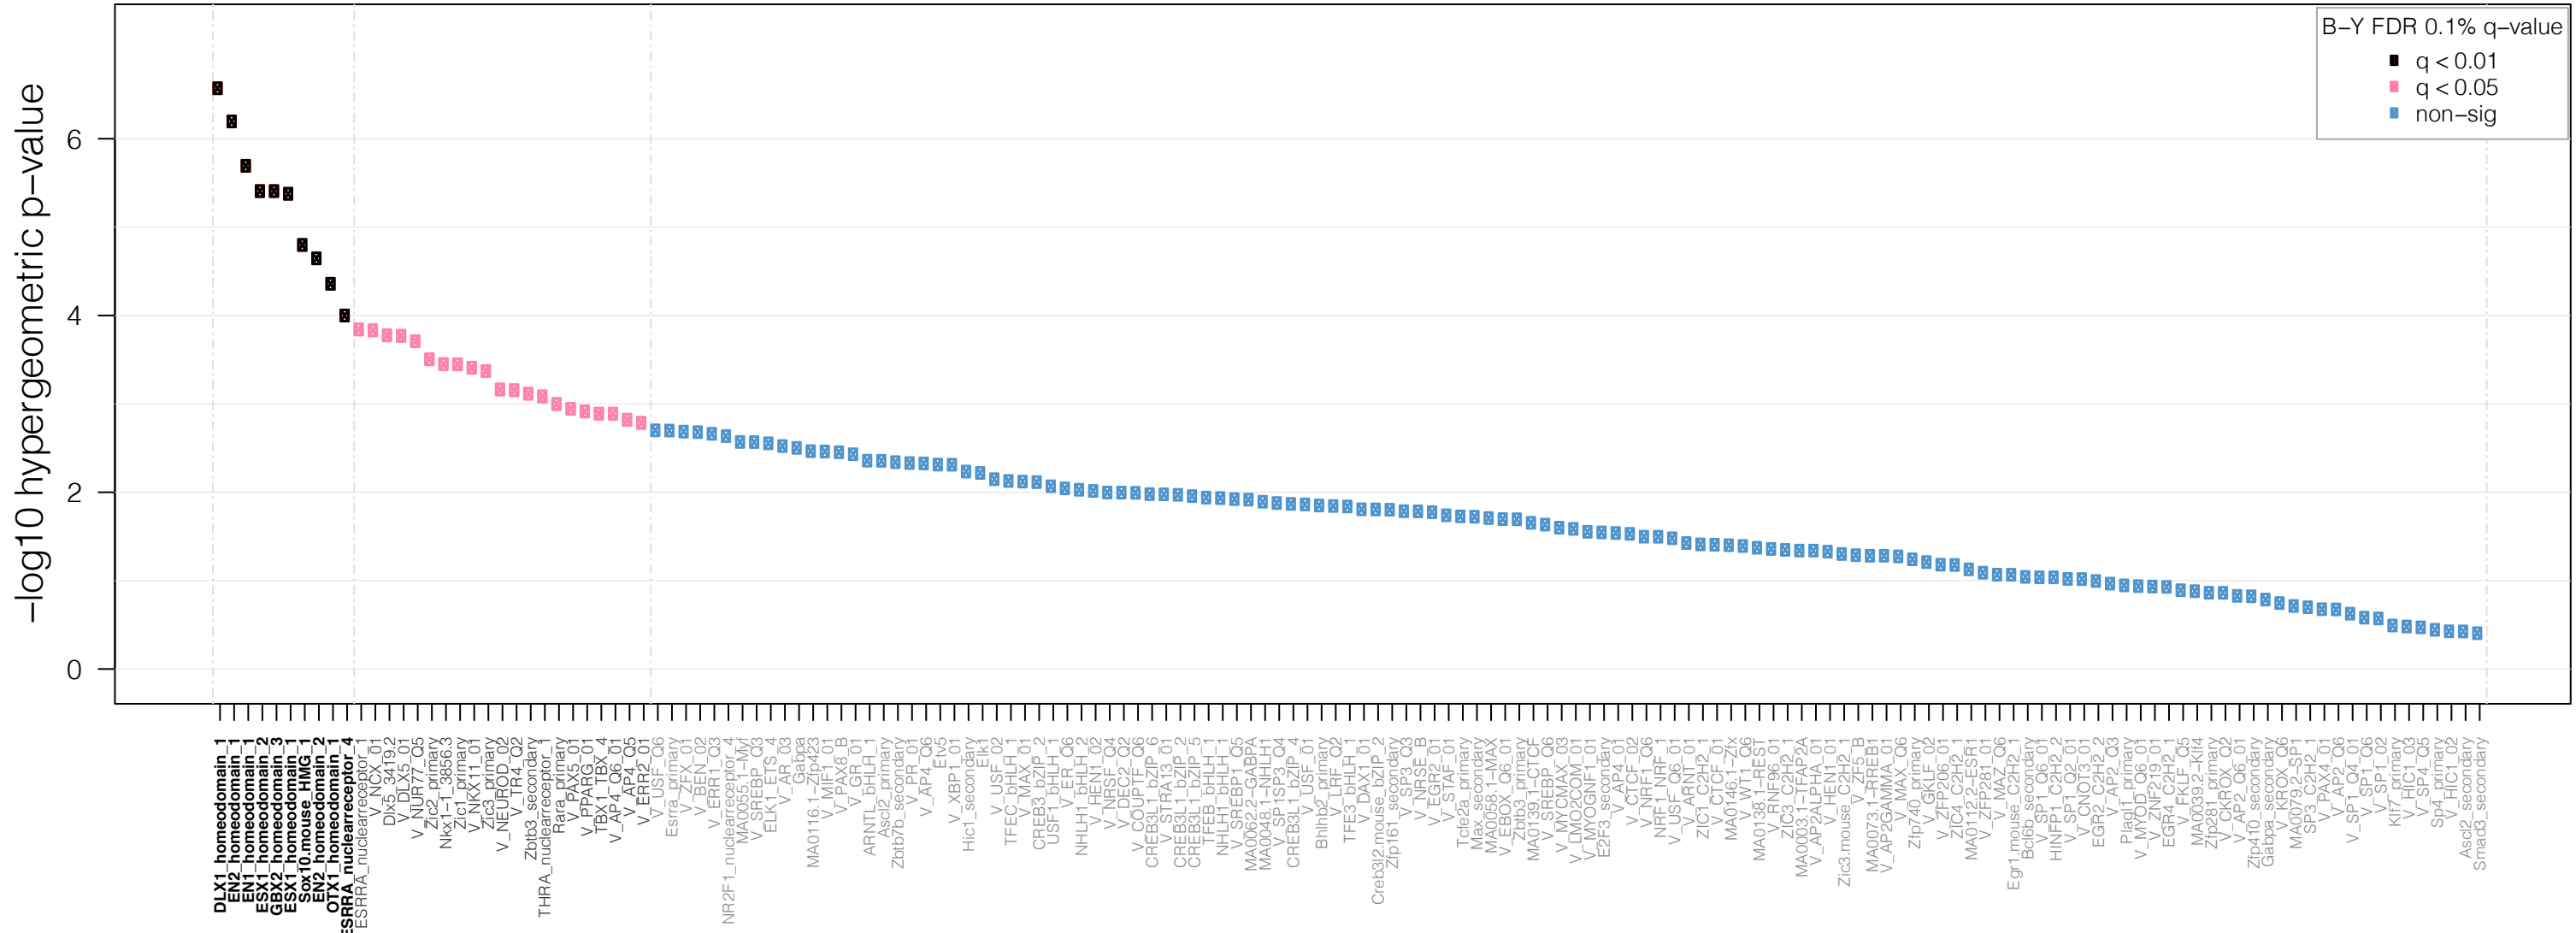

DLX1 homeodomain\_1  
 EN2 homeodomain\_1  
 EN1 homeodomain\_1  
 ESX1 homeodomain\_2  
 GBX2 homeodomain\_3  
 ESX1 homeodomain\_1  
 Sox10 mouse HMG\_1  
 EN2 homeodomain\_2  
 OTX1 homeodomain\_1  
 ESRRB nuclearreceptor\_4  
 ESRRB nuclearreceptor\_1  
 V\_NCX\_01  
 Dlx5\_3419\_2  
 V\_Dlx5\_01  
 V\_NLR7\_05  
 Zic2\_primary  
 Nkx1\_1\_3856\_3  
 Zic1\_primary  
 V\_NKX11\_01  
 Zic3\_primary  
 V\_NEUROD\_02  
 V\_TR4\_02  
 Zbtb3\_secondary  
 Rara\_primary  
 V\_PAX5\_01  
 V\_PPARG\_01  
 TBX1\_TBX\_4  
 V\_AP4\_C6\_01  
 V\_AP4\_C5  
 V\_ERR2\_01  
 V\_USF\_C6  
 V\_USF\_C6  
 Esrra\_primary  
 V\_ZFX\_01  
 V\_BEN\_C2  
 V\_ERR1\_C3  
 NR2F1\_nuclearreceptor\_4  
 MA0055\_1-Mf  
 V\_SREBP\_C3  
 ELK1\_ETS\_4  
 V\_AR\_C3  
 V\_Gabpa  
 MA0116\_1-Zfp423  
 V\_MIF\_01  
 V\_PAX8\_B  
 V\_PAX8\_B  
 V\_GR\_01  
 ARNTL\_bHLH\_1  
 Ascl2\_primary  
 Zbtb7b\_secondary  
 V\_PR\_01  
 V\_AP4\_C6  
 EN5  
 V\_XBP1\_01  
 Hic1\_secondary  
 Elk1  
 V\_USF\_C2  
 TFEC\_bHLH\_1  
 V\_MAX\_01  
 CREB3\_bZIP\_2  
 USF1\_bHLH\_1  
 V\_ER\_C6  
 NHLH1\_bHLH\_2  
 V\_HEN1\_C2  
 V\_NRSF\_C4  
 V\_DEC2\_C2  
 V\_COUPTF\_C6  
 CREB3L1\_bZIP\_6  
 V\_STRA13\_01  
 CREB3L1\_bZIP\_2  
 CREB3L1\_bZIP\_5  
 TFEB\_bHLH\_1  
 NHLH1\_bHLH\_1  
 V\_SREBP1\_C5  
 MA0062\_2-GABPA  
 MA0048\_1-NHLH1  
 V\_SP1SP3\_C4  
 CREB3L1\_bZIP\_4  
 CREB3L1\_USF\_01  
 Bhlh2\_primary  
 TFE3\_bHLH\_1  
 V\_DAX1\_01  
 Creb3l2.mouse\_bZIP\_2  
 Zfp161\_secondary  
 V\_SP3\_C3  
 V\_NRSE\_B  
 V\_EGR2\_01  
 V\_STAF\_01  
 Tle2a\_primary  
 Max\_secondary  
 MA0058\_1-MAX  
 V\_EBOX\_C6\_01  
 Zbtb3\_primary  
 MA0139\_1-CTCF  
 V\_SREBP\_C6  
 V\_MYCMAX\_C3  
 V\_LMO2COM\_01  
 V\_MYOGENF1\_01  
 E2F3\_secondary  
 V\_AP4\_01  
 V\_CTCF\_C2  
 V\_NRF1\_C6  
 NRF1\_NRF1\_06  
 V\_USF\_C6\_01  
 V\_USF\_C6\_01  
 V\_AFN1\_01  
 ZIC1\_C2H2\_1  
 V\_CTCF\_01  
 MA0146\_1-Zk  
 MA0146\_1-Zk  
 MA0138\_1-RES1  
 V\_RNF96\_01  
 Zic3\_C2H2\_1  
 MA0003\_1-TFAP2A  
 V\_AP2ALPHA\_01  
 V\_HEN1\_01  
 Zic3.mouse\_C2H2\_1  
 V\_ZF5\_B  
 MA0073\_1-RRB1  
 V\_AP2GAMMA\_01  
 V\_MAX\_C6  
 Zfp740\_primary  
 V\_GKLF\_C2  
 V\_ZFP206\_01  
 ZIC4\_C2H2\_1  
 MA0112\_2-ESR1  
 V\_ZFP281\_01  
 V\_MAZ\_C6  
 Egr1.mouse\_C2H2\_1  
 Bcl6b\_secondary  
 V\_SP1\_C6\_01  
 HINFP1\_C2H2\_2  
 V\_SP1\_C2\_01  
 V\_CN0T3\_01  
 EGR2\_C2H2\_2  
 V\_AP2\_C3  
 Plagl1\_primary  
 V\_MYOD\_C6\_01  
 V\_ZNF219\_01  
 EGR4\_C2H2\_1  
 V\_KLF\_C5  
 MA0039\_2-Klf4  
 Zfp281\_primary  
 V\_CKROX\_C2  
 V\_AP2\_C6\_01  
 Zfp410\_secondary  
 Gabpa\_secondary  
 V\_KFOX\_C6  
 MA0079\_2-SP1  
 SP3\_C2H2\_1  
 V\_PAX4\_01  
 V\_AP2\_C6  
 V\_SP1\_C4\_01  
 V\_SP1\_C6  
 V\_SPT\_C2  
 Klf7\_primary  
 V\_HIC1\_C3  
 V\_SP4\_C5  
 Sp4\_primary  
 V\_HIC1\_C2  
 Ascl2\_secondary  
 Smad3\_secondary

Transcription factor motif

**Figure S16** TF motif enrichment analysis of MZ-hypomethylated sites (previous page)

Results from the transcription factor (TF) motif enrichment analysis for MZ-hypomethylated sites. B-Y FDR= Benjamini–Yekutieli False Discovery Rate.

**Figure S17** Top-enriched pathways of nearest genes of MZ-hypomethylated sites

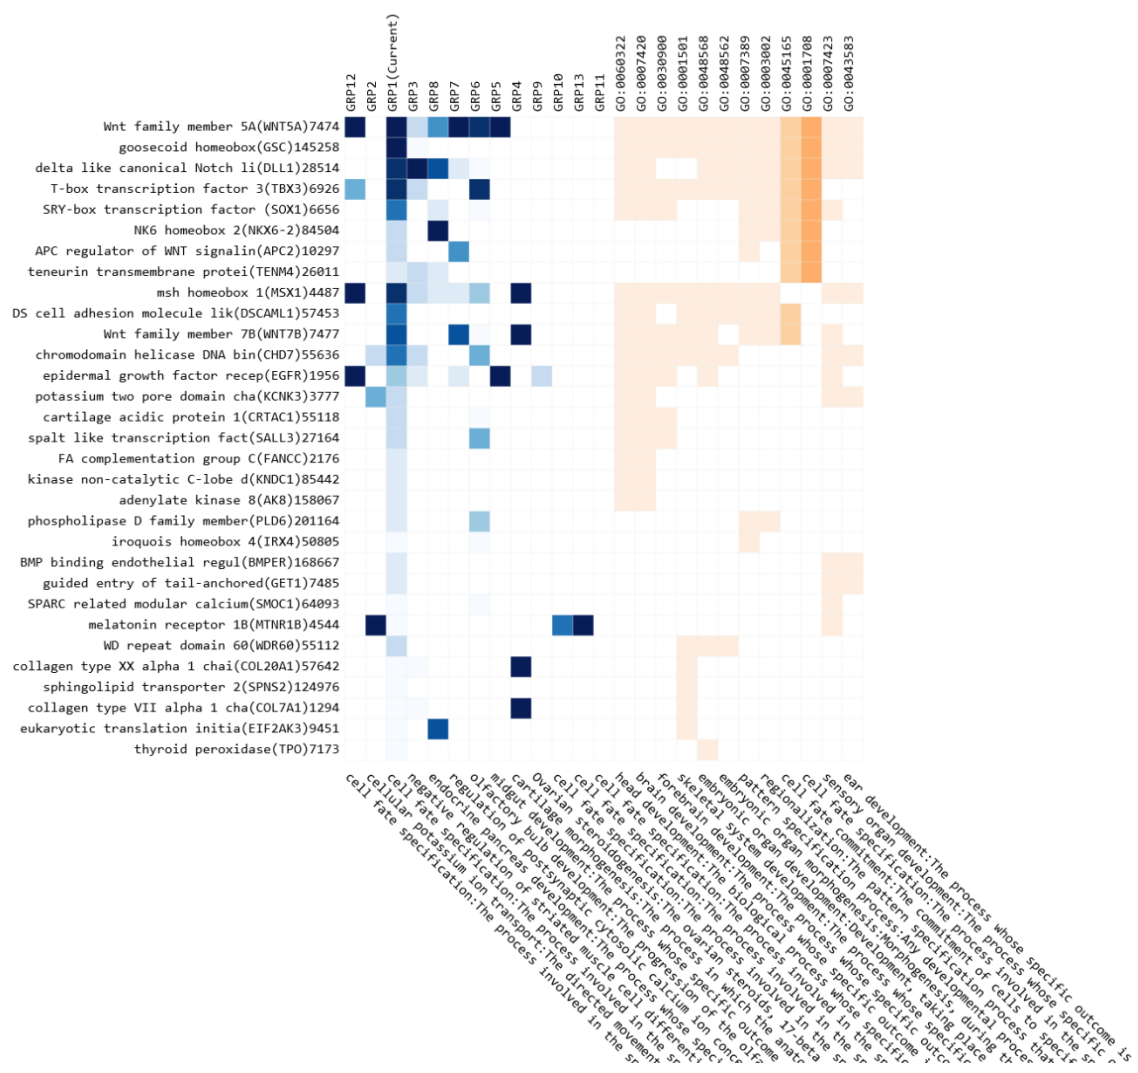

Clustergram showing the top-enriched pathways (cell fate; columns) for MZ-hypomethylated CpGs. Metascape automatically clusters similar GO terms (orange) into groups (GRP, blue). The clustergram shows the membership of genes (rows) involved in groups and GO-terms (columns). Each group consists of multiple GO terms, and each term consists of multiple genes. The rows show the genes that are implicated in the most strongly enriched group of pathways (GRP1; these pathways are related to cell fate; columns). A gene can be involved in many GO pathways of a particular group (dark blue) or can be involved in few (light blue) or no pathways (white) of a particular group. On the right, the orange heatmap shows genes across GO terms (within group 1). The darkness of the orange color reflect the p-value of the given term.

# Probeset TF Associations

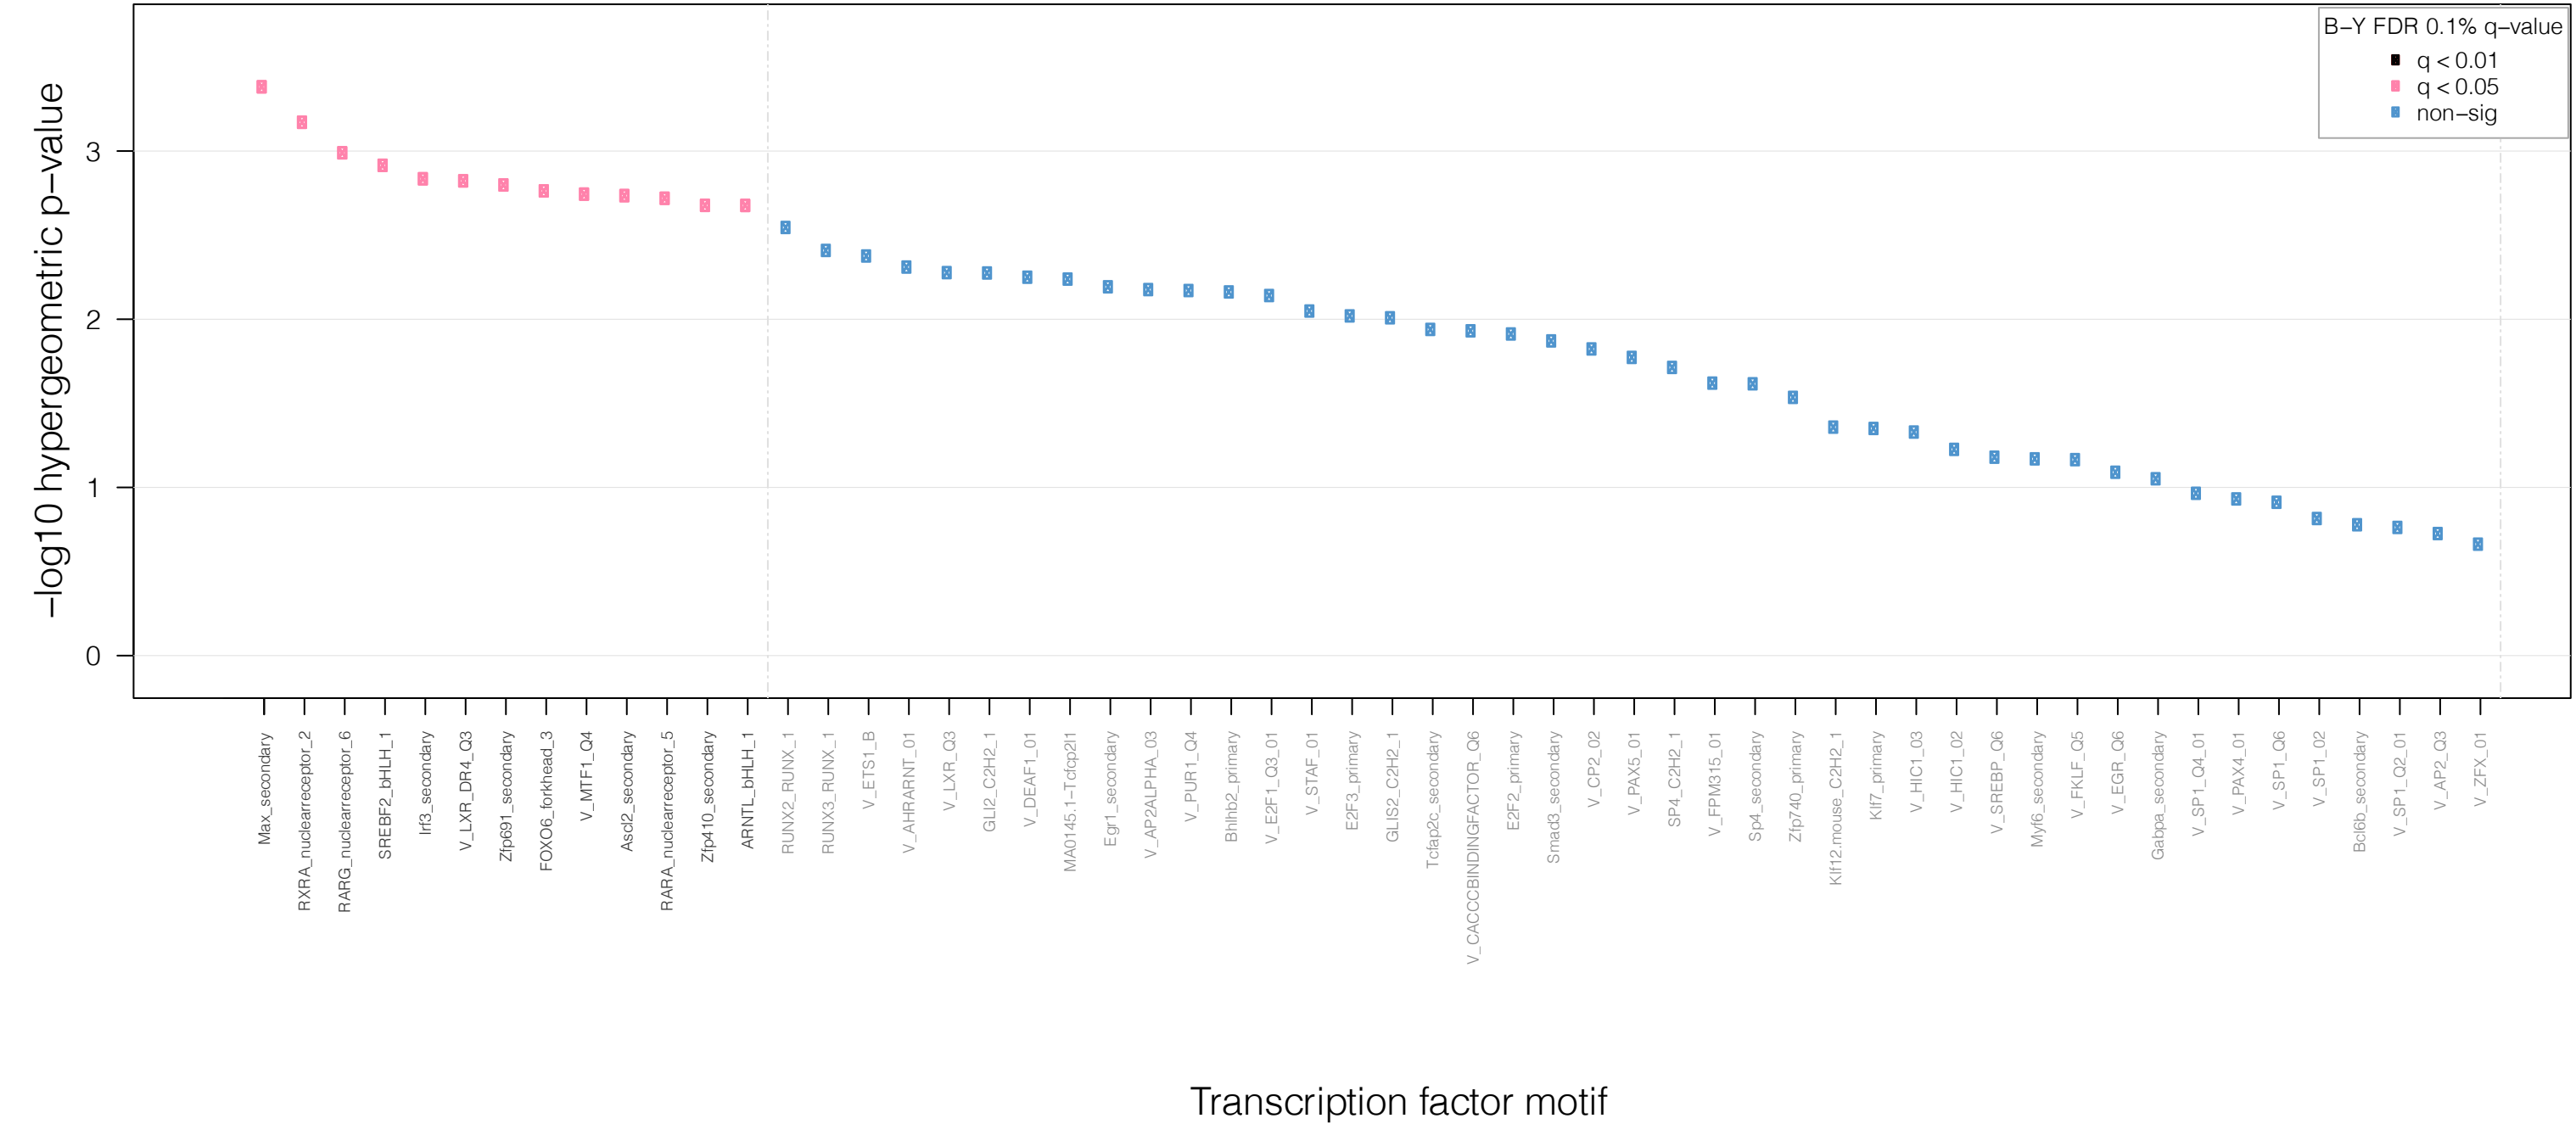

**Figure S18** TF motif enrichment analysis of MZ-hypermethylated sites (previous page)

Results from the transcription factor (TF) motif enrichment analysis for MZ-hypermethylated sites. B-Y FDR= Benjamini–Yekutieli False Discovery Rate.

**Figure S19** Top-enriched pathways of nearest genes of MZ-hypermethylated sites

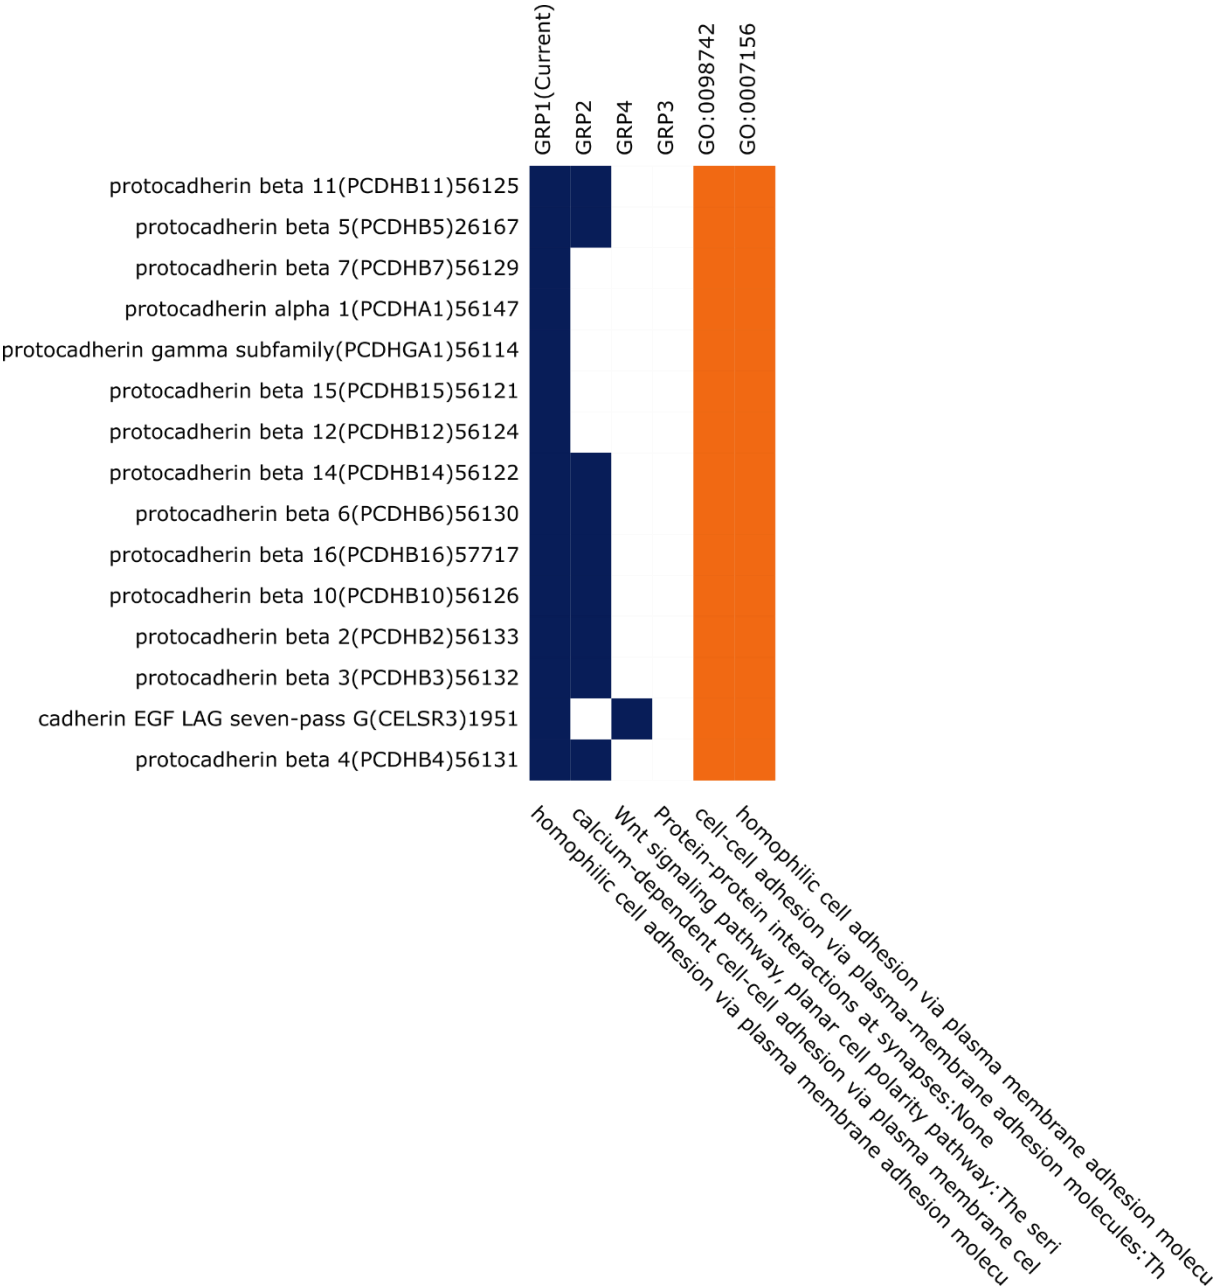

Clustergram showing the top-enriched pathways (cell adhesion; columns) for MZ-hypermethylated CpGs. Metascape automatically clusters similar GO-terms (orange) into groups (GRP, blue). The clustergram shows the membership of genes (rows) involved in groups and GO-terms (columns). Each group consists of multiple GO terms, and each term consists of multiple genes. The rows show the genes that are implicated in the most strongly enriched group of pathways (GRP1; these pathways are related to cell adhesion; columns). A gene can be involved in many GO pathways of a particular group (dark blue) or can be involved in few (light blue) or no pathways (white) of a particular group. On the right, the orange heatmap shows genes across GO terms (within group 1). The darkness of the orange color reflect the p-value of the given term.

**Figure S20** MZ-DMPs are robust to correction for *cis* mQTLs.

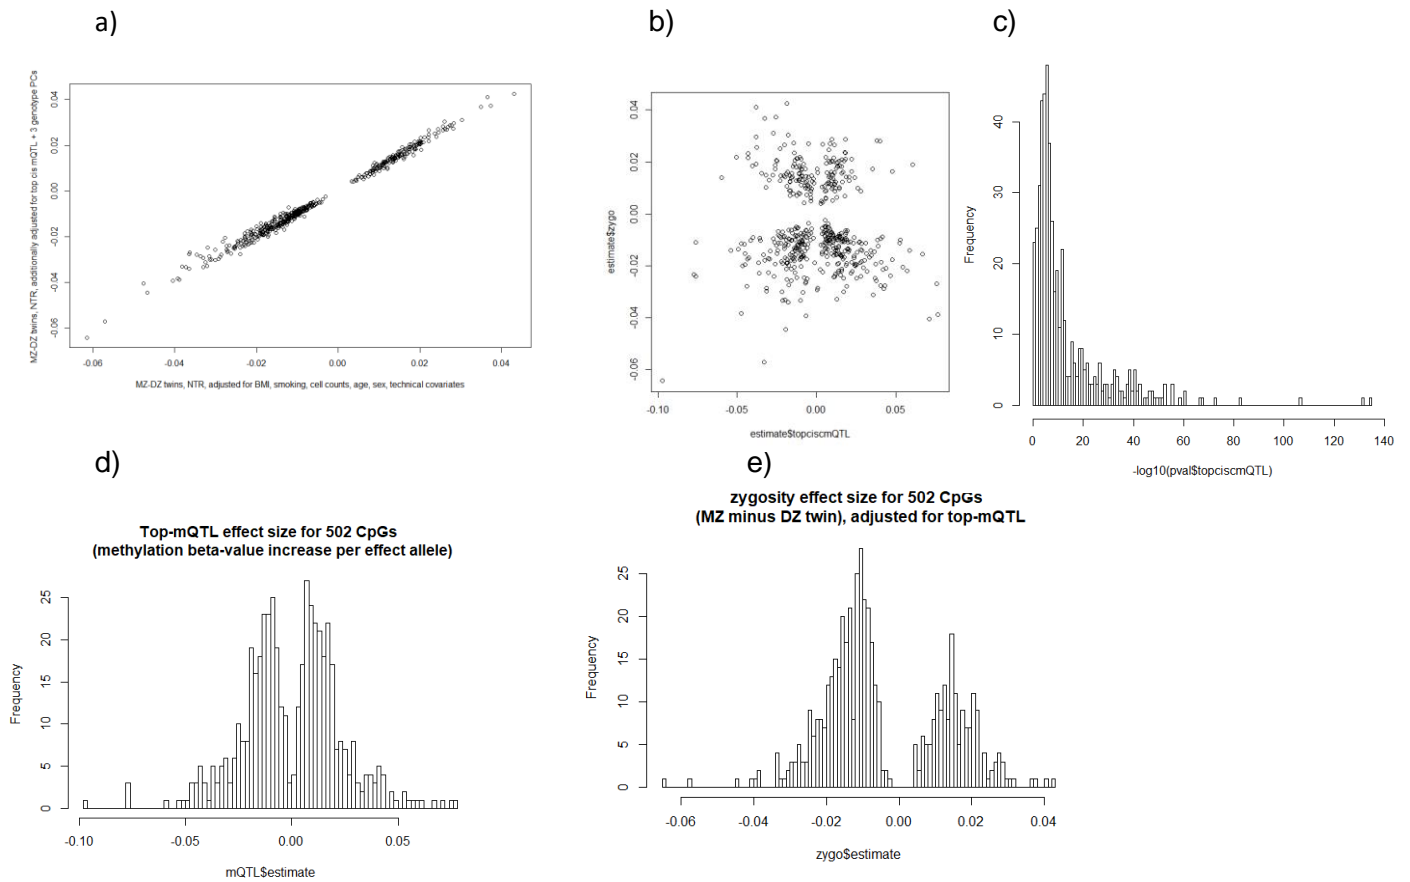

Results from the sensitivity analysis in NTR. a) Methylation difference between MZ and DZ twins from the primary EWAS in NTR (unadjusted for *cis* mQTL, x-axis; N=1957) versus methylation difference between MZ and DZ twins adjusting for the strongest *cis* mQTL for each CpG (y-axis, N=1713). b) Effect size of the strongest *cis* mQTL (x-axis) versus effect size of zygosity (methylation difference between MZ and DZ twins, y-axis). c) P-values for the *cis* mQTL effect confirming that these SNPs are strongly associated with methylation level in this sample. d) Effect sizes of *cis* mQTLs. e) Effect sizes for zygosity (MZ minus DZ twins), adjusted for the top *cis* mQTL.



## Supplementary Tables

**Supplementary Table 1** EWAS cohorts and Bayesian estimates of bias and inflation

| <b>Whole blood</b> |             |                     |           |         |
|--------------------|-------------|---------------------|-----------|---------|
| Cohort             | Sample size | N methylation sites | Inflation | Bias    |
| Brisbane SGS       | 613         | 367,620             | 1.03      | 0.0030  |
| E-Risk             | 1,164       | 367,620             | 1.10      | 0.0103  |
| Finland            | 1,708       | 367,620             | 1.80      | -0.4163 |
| NTR adults         | 1,957       | 367,620             | 1.03      | 0.2585  |
| TwinsUK Study      | 492         | 367,620             | 0.88      | -0.0161 |
| Meta-analysis      | 5,723       | 367,620             | 1.03      | -0.0344 |

  

| <b>Buccal</b> |             |                     |           |      |
|---------------|-------------|---------------------|-----------|------|
| Cohort        | Sample size | N methylation sites | Inflation | Bias |
| NTR children  | 765         | 787,711             | 1.10      | 0.04 |

The R package Bacon was used to obtain Bayesian estimates of bias and inflation and to obtain bias- and inflation-corrected test statistics prior to meta-analysis. The estimates shown for the individual cohorts in this table represent the original estimates prior to adjustment. The meta-analysis estimates were obtained after adjusting the test statistics from the individual EWAS cohorts for bias and inflation with bacon and then meta-analysing the adjusted summary statistics.

**Supplementary Table 2** Enrichment analysis results of telomeric and centromeric regions for MZ-hypomethylated sites

|                 | all CpGs | Proportion | hypo-DMPs | Proportion | X-squared | df | p-value   |
|-----------------|----------|------------|-----------|------------|-----------|----|-----------|
| centromere (5%) | 22771    | 0.06       | 26        | 0.05       | 0.79393   | 1  | 0.3729    |
| Telomeres (5%)  | 83164    | 0.23       | 224       | 0.45       | 143.27    | 1  | < 2.2e-16 |
| N total         | 367620   |            | 497       |            |           |    |           |

**Supplementary Table 3** Enrichment analysis results of telomeric and centromeric regions for MZ-hypermethylated sites

|                 | all CpGs | Proportion | hyper-DMPs | Proportion | X-squared | df | p-value   |
|-----------------|----------|------------|------------|------------|-----------|----|-----------|
| centromere (5%) | 22771    | 0.06       | 137        | 0.41       | 689.31    | 1  | < 2.2e-16 |
| Telomeres (5%)  | 83164    | 0.23       | 40         | 0.12       | 22.28     | 1  | 2.36E-06  |
| N total         | 367620   |            | 337        |            |           |    |           |

**Supplementary Table 4** Enrichment analysis results of genomic regions for MZ-hypomethylated sites

| Genomic Location | Odds Ratio | p Value  | Input | Background |
|------------------|------------|----------|-------|------------|
| 5'UTR            | 0          | 0.0173   | 0     | 0.009      |
| 1stExon          | 0.505      | 0.000393 | 0.05  | 0.095      |
| TSS1500          | 0.327      | 9.77E-14 | 0.07  | 0.188      |
| TSS200           | 0.457      | 2.71E-06 | 0.064 | 0.131      |
| 3'UTR            | 0          | 0.636    | 0     | 0.002      |
| Intergenic       | 1.899      | 7.11E-11 | 0.34  | 0.214      |
| Body             | 1.25       | 0.014    | 0.475 | 0.42       |
| Island           | 3.361      | 1.41E-40 | 0.588 | 0.298      |
| N_Shelf          | 0.252      | 1.97E-06 | 0.016 | 0.061      |
| N_Shore          | 1.157      | 0.288    | 0.129 | 0.113      |
| OpenSea          | 0.307      | 3.89E-26 | 0.149 | 0.363      |
| S_Shelf          | 0.385      | 0.000215 | 0.024 | 0.06       |
| S_Shore          | 0.892      | 0.51     | 0.095 | 0.105      |

**Supplementary Table 5** Enrichment analysis results of genomic regions for MZ-hypermethylated sites

| Genomic Location | Odds Ratio | p Value  | Input | Background |
|------------------|------------|----------|-------|------------|
| 5'UTR            | 0          | 8.29E-02 | 0     | 0.009      |
| 1stExon          | 2.597      | 7.24E-11 | 0.214 | 0.095      |
| TSS1500          | 0.934      | 6.76E-01 | 0.178 | 0.188      |
| TSS200           | 0.649      | 2.33E-02 | 0.089 | 0.131      |
| 3'UTR            | 0          | 1.00E+00 | 0     | 0.002      |
| Intergenic       | 2.62       | 9.16E-17 | 0.415 | 0.214      |
| Body             | 0.558      | 5.92E-07 | 0.288 | 0.42       |
| Island           | 2.008      | 3.88E-10 | 0.46  | 0.298      |
| N_Shelf          | 0.717      | 2.53E-01 | 0.045 | 0.061      |
| N_Shore          | 2.32       | 2.40E-09 | 0.228 | 0.113      |
| OpenSea          | 0.135      | 8.28E-36 | 0.071 | 0.363      |
| S_Shelf          | 0.675      | 1.69E-01 | 0.042 | 0.06       |
| S_Shore          | 1.558      | 5.57E-03 | 0.154 | 0.105      |

**Supplementary Table 6** EWAS atlas enrichment analysis results for MZ-hypermethylated sites

| Trait                                                              | Odds Ratio | p Value   | DMC | Background |
|--------------------------------------------------------------------|------------|-----------|-----|------------|
| folic acid supplement during pregnancy                             | 293.283    | 7.28E-154 | 39  | 470        |
| neurodevelopmental presentations and congenital anomalies (ND/CAs) | 65.216     | 1.21E-50  | 18  | 856        |
| facial anomalies syndrome (ICF)                                    | 173.683    | 3.80E-37  | 10  | 181        |
| Klinefelter syndrome                                               | 137.878    | 1.47E-28  | 8   | 179        |
| thyroid lesion                                                     | 18.729     | 2.25E-20  | 11  | 1753       |
| Kabuki syndrome (KS)                                               | 17.342     | 1.09E-19  | 11  | 1891       |
| follicular thyroid carcinoma                                       | 8.6        | 7.05E-19  | 16  | 5575       |
| sperm viability                                                    | 26.474     | 1.45E-17  | 8   | 898        |
| Alzheimer's disease (AD)                                           | 19.204     | 3.58E-17  | 9   | 1392       |
| preterm birth                                                      | 4.986      | 7.87E-15  | 18  | 10662      |
| fetal alcohol spectrum disorder (FASD)                             | 31.094     | 2.26E-14  | 6   | 571        |
| type 1 diabetes (T1D)                                              | 322.426    | 1.23E-13  | 3   | 30         |
| gender                                                             | 3.064      | 2.31E-09  | 21  | 15433      |
| Claes-Jensen syndrome                                              | 13.957     | 6.21E-09  | 5   | 1050       |
| leukoaraiosis (LA)                                                 | 22.095     | 6.25E-09  | 4   | 531        |
| primary Sjgren's Syndrome (pSS)                                    | 5.806      | 3.49E-07  | 7   | 3526       |
| respiratory allergies (RA)                                         | 18.067     | 1.55E-06  | 3   | 485        |
| maternal smoking                                                   | 3.791      | 1.20E-05  | 8   | 6153       |
| response to systemic corticosteroid                                | 26.693     | 2.00E-05  | 2   | 219        |
| maternal alcohol consumption                                       | 5.516      | 2.34E-05  | 5   | 2640       |
| pediatric acute lymphoblastic leukemia                             | 264.239    | 3.75E-05  | 1   | 12         |
| osteoporosis                                                       | 240.612    | 4.37E-05  | 1   | 13         |
| pan-cancer                                                         | 15.989     | 1.41E-04  | 2   | 364        |
| human herpesvirus 6B infection                                     | 14.328     | 2.13E-04  | 2   | 406        |
| maternal phthalate exposure                                        | 13.983     | 2.33E-04  | 2   | 416        |
| lifetime estrogen exposure                                         | 70.56      | 4.28E-04  | 1   | 42         |
| childhood stress                                                   | 10.561     | 6.61E-04  | 2   | 550        |
| ancestry                                                           | 2.251      | 1.90E-03  | 9   | 10618      |
| maternal pre-pregnancy body mass index (BMI)                       | 26.499     | 2.81E-03  | 1   | 110        |
| gestational diabetes mellitus                                      | 2.632      | 2.96E-03  | 6   | 6599       |
| arsenic exposure                                                   | 25.566     | 3.01E-03  | 1   | 114        |
| urological cancer                                                  | 22.732     | 3.76E-03  | 1   | 128        |
| maternal pre-pregnancy obesity                                     | 18.047     | 5.86E-03  | 1   | 161        |
| high-risk non-muscle invasive bladder cancer (HR-NMIBC)            | 14.152     | 9.29E-03  | 1   | 205        |

DMC=Differentially methylated CpGs - This is the number of methylation sites that is an MZ-DMP and has been previously associated with the trait reported in the first column.

Background= Total number of methylation sites previously associated with the trait in the first column.

**Supplementary Table 7** EWAS atlas enrichment analysis results for MZ-hypomethylated sites

| Trait                                                                        | Odds Ratio | p Value   | DMC | Background |
|------------------------------------------------------------------------------|------------|-----------|-----|------------|
| Kabuki syndrome (KS)                                                         | 69.641     | 9.46E-159 | 58  | 1891       |
| ancestry                                                                     | 7.732      | 2.27E-42  | 42  | 10618      |
| gender                                                                       | 5.357      | 1.56E-37  | 49  | 15433      |
| breastfeeding                                                                | 82.347     | 5.86E-31  | 10  | 252        |
| respiratory allergies (RA)                                                   | 46.22      | 1.20E-28  | 11  | 485        |
| B Acute Lymphoblastic Leukemia with t(1;19)(q23;p13.3); E2A-PBX1 (TCF3-PBX1) | 3.424      | 2.52E-21  | 44  | 21099      |
| neurodevelopmental presentations and congenital anomalies (ND/CAs)           | 18.687     | 2.65E-15  | 8   | 856        |
| ankylosing spondylitis                                                       | 45.354     | 8.56E-14  | 5   | 222        |
| maternal smoking                                                             | 5.191      | 3.97E-13  | 16  | 6153       |
| SETD1B-related syndrome                                                      | 8.056      | 4.17E-13  | 11  | 2721       |
| maternal pre-pregnancy body mass index (BMI)                                 | 74.224     | 6.08E-13  | 4   | 110        |
| alcohol dependence                                                           | 173.243    | 4.31E-12  | 3   | 37         |
| maternal lead exposure                                                       | 28.149     | 8.21E-12  | 5   | 355        |
| follicular thyroid carcinoma                                                 | 4.998      | 2.41E-11  | 14  | 5575       |
| gestational diabetes mellitus                                                | 4.523      | 5.27E-11  | 15  | 6599       |
| folic acid supplement during pregnancy                                       | 21.182     | 1.22E-10  | 5   | 470        |
| plasma fasting HOMA-IR levels                                                | 561.24     | 3.62E-10  | 2   | 9          |
| multiple sclerosis                                                           | 3.928      | 3.91E-10  | 16  | 8093       |
| colorectal laterally spreading tumor                                         | 3.855      | 6.13E-10  | 16  | 8245       |
| household socioeconomic status in childhood                                  | 16.004     | 1.69E-09  | 5   | 620        |
| intermittent explosive disorder                                              | 156.368    | 2.57E-08  | 2   | 27         |
| sperm viability                                                              | 11.02      | 5.31E-08  | 5   | 898        |
| sedentary behavior                                                           | 122.459    | 6.33E-08  | 2   | 34         |
| multiple system atrophy                                                      | 25.294     | 2.49E-05  | 2   | 157        |
| high saturated fatty acids diet                                              | 5.009      | 5.03E-05  | 5   | 1965       |
| cardiac autonomic responses (acceleration capacity)                          | 216.014    | 5.74E-05  | 1   | 10         |
| osteoporosis                                                                 | 163.521    | 9.48E-05  | 1   | 13         |
| Alzheimer's disease (AD)                                                     | 5.654      | 1.23E-04  | 4   | 1392       |
| B Acute Lymphoblastic Leukemia with dic(9;20)(p11;q13)                       | 4.132      | 2.34E-04  | 5   | 2379       |
| thyroid lesion                                                               | 4.483      | 5.63E-04  | 4   | 1753       |
| perinatally-acquired HIV                                                     | 4.498      | 2.63E-03  | 3   | 1309       |
| childhood stress                                                             | 7.144      | 2.71E-03  | 2   | 550        |
| primary Sjgren's Syndrome (pSS)                                              | 2.779      | 4.25E-03  | 5   | 3526       |
| maternal corticotropin-releasing hormone level                               | 20.585     | 4.58E-03  | 1   | 96         |
| response to antidepressants                                                  | 14.169     | 9.30E-03  | 1   | 139        |

DMC=Differentially methylated CpGs - This is the number of methylation sites that is an MZ-DMP and has been previously associated with the trait reported in the first column.

Background= Total number of methylation sites previously associated with the trait in the first column.

**Supplementary Table S8** Enrichment analysis results of age-VMPs for MZ-hypomethylated sites

|         | all CpGs | Proportion | hypo-DMPs | Proportion | X-squared | df | p-value  |
|---------|----------|------------|-----------|------------|-----------|----|----------|
| ageVMPs | 5606     | 0.02       | 22        | 0.04       | 27.903    | 1  | 1.28E-07 |
| N total | 367620   |            | 497       |            |           |    |          |

**Supplementary Table S9** Enrichment analysis results of age-VMPs for MZ-hypermethylated sites

|         | all CpGs | Proportion | hyper-DMPs | Proportion | X-squared | df | p-value   |
|---------|----------|------------|------------|------------|-----------|----|-----------|
| ageVMPs | 5606     | 0.02       | 35         | 0.10       | 176.36    | 1  | < 2.2e-16 |
| N total | 367620   |            | 337        |            |           |    |           |

## Supplementary References

1. Chen, Y. *et al.* Discovery of cross-reactive probes and polymorphic CpGs in the Illumina Infinium HumanMethylation450 microarray. *Epigenetics* **2294**, (2013).
2. Zhou, W., Laird, P. W. & Shen, H. Comprehensive characterization, annotation and innovative use of Infinium DNA methylation BeadChip probes. *Nucleic Acids Res.* (2017). doi:10.1093/nar/gkw967
3. Hop, P. J. *et al.* Cross-reactive probes on Illumina DNA methylation arrays: a large study on ALS shows that a cautionary approach is warranted in interpreting epigenome-wide association studies. *NAR Genomics Bioinforma.* **2**, (2020).
4. Min, J. L. *et al.* Genomic and phenomic insights from an atlas of genetic effects on DNA methylation. *medRxiv* 2020.09.01.20180406 (2020). doi:10.1101/2020.09.01.20180406
5. Maldonado-Saldivia, J. *et al.* Dppa2 and Dppa4 Are Closely Linked SAP Motif Genes Restricted to Pluripotent Cells and the Germ Line . *Stem Cells* **25**, 19–28 (2007).
6. Masaki, H., Nishida, T., Kitajima, S., Asahina, K. & Teraoka, H. Developmental pluripotency-associated 4 (DPPA4) localized in active chromatin inhibits mouse embryonic stem cell differentiation into a primitive ectoderm lineage. *J. Biol. Chem.* **282**, 33034–33042 (2007).
7. Oliviero, G. *et al.* The variant Polycomb Repressor Complex 1 component PCGF1 interacts with a pluripotency sub-network that includes DPPA4, a regulator of embryogenesis. *Sci. Rep.* **5**, (2015).
8. Hernandez, C. *et al.* Dppa2/4 Facilitate Epigenetic Remodeling during Reprogramming to Pluripotency Cell Stem Cell Article Dppa2/4 Facilitate Epigenetic Remodeling during Reprogramming to Pluripotency. *Cell Stem Cell* **23**, 396–411 (2018).
9. Kessler, N. J., Waterland, R. A., Prentice, A. M. & Silver, M. J. Establishment of environmentally sensitive DNA methylation states in the very early human embryo. *Sci. Adv.* **4**, (2018).
